1 Retinoic Acid Inducible Gene-I like Receptors Activate Snail and Slug to Limit RNA Viral  
2 Infections

3

4

5 Dhiviya Vedagiri<sup>1,6</sup>, Divya Gupta<sup>1</sup>, Anurag Mishra<sup>2</sup>, Gayathri Krishna<sup>3</sup>, Meenakshi Bhaskar<sup>4</sup>,  
6 Anirban Basu<sup>4</sup>, Debasis Nayak<sup>2</sup>, Manjula Kalia<sup>5</sup>, Mohanan Valiya Veetil<sup>3</sup>, and Krishnan  
7 Harinivas Harshan<sup>1,6\*</sup>

8 <sup>1</sup>CSIR-Centre for Cellular and Molecular Biology, Uppal Road, Hyderabad-500007, India

9 <sup>2</sup> Discipline of Biosciences and Biomedical Engineering, Indian Institute of Technology  
10 Indore, Simrol, Indore-453552, India

11 <sup>3</sup>Virology Laboratory, Department of Biotechnology, Cochin University of Science and  
12 Technology, Cochin, Kerala-682022, India

13 <sup>4</sup> National Brain Research Centre, Manesar, Haryana-122052, India

14 <sup>5</sup> Regional Centre for Biotechnology, NCR Biotech Science Cluster, Faridabad, Haryana-  
15 121001, India

16 <sup>6</sup>Academy for Scientific and Innovative Research (AcSIR), Ghaziabad-201002, India

17

18 \*Correspondence and lead contact: [hkrishnan@ccmb.res.in](mailto:hkrishnan@ccmb.res.in)

19

20 Keywords: Epithelial-Mesenchymal Transition-Transcription Factors (EMT-TFs), Innate  
21 antiviral response, Interferon Regulatory Factor 3 (IRF3), Interferon Stimulated Response  
22 Element (ISRE), RNA virus

23

24

25

26

27

28

29

30

31

32

### 33 **ABSTRACT**

34 RLRs sense cytosolic non-self RNAs including viral RNAs before mounting a response  
35 leading to the activation of Type-I IFNs. Here, we identify a previously unknown regulation of  
36 Snail, a transcription regulator known in EMT, during RNA viral infections and describe its  
37 possible implication. RNA viral infections, poly (I:C) transfection and ectopic expression of  
38 RLR components activated Snail and Slug in epithelial cells. Detailed examination revealed  
39 that MAVS and phosphorylated IRF3 are essential in this regulation. We identified two  
40 ISREs in *SNAI1* promoter region and their alterations rendered the promoter non-responsive  
41 to phospho-IRF3 in luciferase assay. Ectopic expression of Snail and Slug activated RLR  
42 pathway and dramatically limited RNA viral infections in epithelial cells pointing to their  
43 antiviral functions. Thus, Snail and Slug are transcriptionally regulated by RLRs in a similar  
44 manner as IFN- $\beta$  and they in turn promote RLR pathway possibly strengthening the antiviral  
45 state in the cell.

### 46 **INTRODUCTION**

47 Epithelial cells are early barriers that encounter viral infections. Despite being immune  
48 generalists, they mount a robust innate antiviral immune response, thereby producing type-I  
49 interferons (IFN) that limit viral spread (1). Pathogen associated molecular patterns (PAMP)  
50 are detected by pattern recognition receptors (PRR), further assisting the infected cells in  
51 mounting responses against pathogens. Nucleic acids of viral origin are strong PAMPs that  
52 trigger a cellular response through cytosolic PRRs (2). RIG-I and MDA5 are two such PRRs  
53 that recognize RNA of virus origin (3-6). The two N-terminal CARD domains of these  
54 molecules allow them to oligomerize and to interact independently with the mitochondrial  
55 antiviral signalling protein (MAVS) that subsequently oligomerizes through its CARD-like  
56 domains on the outer membrane of mitochondria. In turn, these events recruit TBK1 and  
57 IRF3, leading to IRF3 phosphorylation on several residues in its C-terminal domain by TBK1  
58 (7-9). Phosphorylated IRF3 undergoes homodimerization before translocating to the nucleus  
59 where it associates with promoter regions of Type I IFN genes, IFN- $\alpha$  and IFN- $\beta$ , through  
60 ISRE elements. (7, 10)

61 Epithelial-mesenchymal transition (EMT) is a biological process with essential functions in  
62 embryo development, wound healing, and cancer metastasis (11-13). During EMT, epithelial  
63 cells leave true epithelialness to acquire varying degrees of mesenchymalness. A set of  
64 transcription factors from the Snail, Twist, and Zeb families, collectively referred to as EMT-  
65 TFs, facilitate the transition through major transcriptional reprogramming (14, 15). They  
66 suppress several epithelial markers, including junction proteins E-cadherin and Claudin, and  
67 activate mesenchymal markers such as Vimentin and Fibronectin (14). Some of the key  
68 signal pathways that regulate EMT-TFs are TGF- $\beta$ , Wnt/ $\beta$ -Catenin, PI3K-AKT/GSK-3 $\beta$ ,  
69 Jagged, Notch, Hedgehog, and Hippo (16). EMT provides enormous flexibility to the cellular  
70 phenotype and behavior, which are well exploited by the three events mentioned earlier.

71 Several recent reports have demonstrated EMT induction during infection by oncoviruses  
72 such as hepatitis B (HBV)(17), human papilloma (HPV)(18), Epstein Barr (EBV) (19),  
73 Kaposi's sarcoma-associated herpesvirus (KSHV) and hepatitis C (HCV)(20) viruses, both *in*  
74 *vitro* and *in vivo*. Various viral proteins also activate key regulatory pathways activating EMT-  
75 TFs (21). One speculated potential outcome of this EMT is the progression of cancer  
76 induced by these viruses. Notwithstanding their contribution to cancer progression, viruses

77 are unlikely to induce EMT at initial periods of infections with an impact on cancer that  
78 develops several years post-infection. Further, induction of EMT by a few non-oncoviruses  
79 such as Ebolavirus (EBOV)(22), Respiratory Syncytial Virus (RSV) (23), Human  
80 Cytomegalovirus (HCMV)(24), Human Rhinovirus (HRV) (25) and also HIV(26) point to the  
81 likelihood of its unidentified roles in viral infection. Nevertheless, there is a lacuna in our  
82 understanding of EMT activation by viruses from diverse families through common  
83 mechanisms and the biological consequence of such activation on the infection.

84 In this study, we addressed two significant questions on virus-induced EMT. First, we sought  
85 to identify a universal pathway used by viruses to induce EMT. Here, we identified that the  
86 RLR-IRF3 pathway that is employed to regulate Type-I IFN expression during viral infections  
87 also regulate Snail and Slug. In the second, we investigated the consequences of EMT on  
88 viral infections. This universal mechanism is likely used by all the cells in response to RNA  
89 viruses. We also establish that EMT-TFs have significant antiviral properties against RNA  
90 viruses. Through these studies, we identified a previously unknown mechanism of activation  
91 of Snail and Slug by innate antiviral pathways that, in turn, facilitates the sustenance of the  
92 antiviral response.

## 93 **RESULTS**

### 94 **EMT is a universal response to RNA virus infection**

95 In order to test the possibility of EMT being a typical response in viral infection, we  
96 investigated if it is induced in response to infections by common non-onco RNA viruses  
97 Dengue (DENV), Japanese encephalitis (JEV), and Vesicular stomatitis virus (VSV) in  
98 common epithelial cancer cell lines. A549 cells robustly express E-cadherin with modest  
99 levels of Vimentin, Snail, and Slug (Figure S1A). Huh7.5 cells express E-cadherin, Vimentin,  
100 and Snail, but no Slug. MCF-7 expresses robust levels of epithelial marker E-cadherin and  
101 undetectable levels of mesenchymal marker Vimentin. EMT-TFs Snail and Slug were also  
102 undetected in them. We noticed a significant drop in E-cadherin and increased Vimentin  
103 levels in A549 and Huh7.5 cells infected with DENV, indicating EMT (Figure 1A). A similar  
104 change in E-cadherin levels in MCF-7 cells was visible without affecting Vimentin levels.  
105 Similar to DENV, JEV infection also brought about changes in EMT markers (Figure 1A). In  
106 agreement, infected cells reported elevated levels of *SNAI1*, *SNAI2*, and *ZEB1* transcripts  
107 (Figure 1 B-D). Remarkable activation of *ZEB2* transcripts in A549 but not in MCF-7 and  
108 Huh7.5 cells upon JEV and DENV infection (Figure S1B) suggests cell-specific activation of  
109 EMT-TFs and their redundancy in viral infections. At transcript levels, lower *CDH1*, and  
110 higher *VIM* in infected samples demonstrated induction of EMT transcriptional  
111 reprogramming by these (+) stranded RNA viruses (Figure S1 C-E). Strong activation of *VIM*  
112 transcripts in MCF-7 cells shows transcriptional regulation consistent with EMT (Figure S1  
113 E), but the absence of its induction at protein level points to additional post-transcriptional  
114 regulatory events. VSV, a (-) stranded RNA virus, induced *SNAI1* substantially, and *SNAI2*  
115 and *ZEB1* moderately (Figure 1E). The presence of GFP confirmed VSV infection in infected  
116 cells compared to mock-infected cells (Figure S1F). These results illustrate that RNA virus  
117 infections induce EMT as a general cellular response. Additionally, they indicate that EMT  
118 early during viral infections need not necessarily be intended at promoting oncogenesis.

119 To gain further insight into the interplay between virus infection and EMT markers, EMT was  
120 analyzed over a time course spanning from 24-72 hpi. Detection of DENV envelope from 24

121 hpi in infected A549 cells confirmed the infection (Figure 1F). Substantial E-Cadherin  
122 depletion and a concomitant increase in Vimentin were evident in the infected cells. Elevated  
123 Snail in the infected cells indicated the onset of EMT as early as 24 hpi. The activation of  
124 Snail and depletion of E-Cadherin was also evident in JEV infected MCF-7 cells (Figure 1G).  
125 A gradual activation of *SNAI1* and *SNAI2* transcripts was visible from 36 hpi (Figure S1G).  
126 Thus, our observations indicate that EMT is set early during infection and remains  
127 throughout the infection period tested.

128 We further tested if EMT is induced *in vivo*. Intraperitoneal injection of JEV in mice resulted  
129 in increased *Snai1* levels in the brain where high JEV RNA levels were present (Figure 1H),  
130 but not in the liver where JEV RNA was absent, demonstrating that viral infection could  
131 induce EMT-TFs *in vivo* (Figure 1I). Juxtaposing our results with the existing literature  
132 suggests that EMT induction is a general response to viral infection.

133 EMT could be induced as a consequence of the interaction between the virion and cell  
134 surface receptors, viral replication, or through signaling activities promoted by viral proteins.  
135 In order to test this, we infected MCF-7 cells with UV inactivated JEV. The inactivated virus  
136 could not establish infection, as is evident from Figure 1J. Interestingly, the inactivated virus  
137 also did not induce EMT, unlike the infectious virus suggesting that post-entry events are  
138 critical for EMT during viral infections.

### 139 **EMT-TFs Snail and Slug are induced by viral RNA**

140 Several viral proteins having no shared features among them have been demonstrated to  
141 induce EMT (19, 27, 28). Since various RNA viruses across different classes induce EMT,  
142 we reasoned that viral RNA molecules could be behind it as they are sensed by PRRs sense  
143 it based on their common molecular patterns. This hypothesis was tested by transfecting  
144 MCF-7 cells with total RNA purified from JEV or mock-infected cells and analyzing EMT at  
145 multiple time intervals. RNA transfection was confirmed by the presence of JEV RNA at 12 h  
146 post-transfection (hpt) (Figure 2A) and by the robust activation of antiviral *IFNB1* and *IFIT1*  
147 transcripts (Figure 2B). Substantial *SNAI1* activation was seen in cells transfected with RNA  
148 from JEV infected cells compared with the control cells that received RNA from mock-  
149 infected cells (Figure 2C). The activation was visible from 12 hpt, intensified until 48 hpt, and  
150 remained at significant levels thereafter. *SNAI2* and *ZEB1* transcripts were also activated,  
151 albeit by lower magnitude from 36 hpt. Significant activation of *VIM* was evident from 36 hpt,  
152 while *CDH1* levels dropped by 60 hpt (Figure 2D). These results support the idea that viral  
153 RNA can induce EMT, despite the possibility that viral proteins generated from transfected  
154 RNA could also have contributed to the process.

155 To validate this observation, we transfected *in-vitro* transcribed HCV ssRNA into MCF-7  
156 cells. HCV RNA is not expected to replicate in non-hepatic MCF-7 cells, and hence the RNA  
157 would remain in ss- form. Among other potential factors, the absence of *miR-122*, a liver  
158 enriched factor key for HCV RNA stabilization and replication, could be a reason for this non-  
159 permissiveness of MCF-7 (29). HCV RNA transfection (Figure 2E) elicited a robust antiviral  
160 response in MCF-7 cells, as shown by elevated *IFNB1* and *IFIT1* transcripts (Figure 2F).  
161 Interestingly, HCV RNA substantially induced *SNAI1* and *SNAI2* in MCF-7 (Figure 2G). The  
162 activation of *SNAI1* and *SNAI2* in them suggests that single-stranded viral RNA can induce  
163 EMT-TFs just as it activates type-I IFN. These results indicated the involvement of the

164 primary RNA sensors RIG-I and MDA5 that regulate type-I IFN production in response to  
165 RNA virus infection.

166 To further confirm the above findings, we performed transfection of dsRNA mimic poly (I:C)  
167 that is well known to activate the RLR pathway. Transfection of 500 ng/mL poly (I:C) into  
168 MCF-7 cells triggered significant antiviral response evidenced by robust activation of *IFIH1*,  
169 *DDX58* (encoding MDA-5 and RIG-I respectively) and *IFITM1* (Figure 2H). As seen in HCV  
170 RNA transfection, poly (I:C) transfection significantly activated *SNAI1* and lesser but still  
171 considerable extent *SNAI2* and *ZEB1* (Figure 2I). This finding was substantiated by  
172 immunoblotting (Figure 2J). Transfection of 1000ng/mL poly (I:C) further up-regulated the  
173 EMT-TF transcripts. *SNAI2* and *ZEB2* were robustly activated, while *SNAI1* activation was  
174 modest in poly (I:C) transfected A549 (Figure S2A and B ) cells. Consistent activation of  
175 Slug with no change in Snail by the treatment in A549 indicated the redundancy displayed  
176 between the EMT-TFs across cell types (Figure S2C). Further strengthening this data, poly  
177 (I:C) transfection in HEK293 cells activated *SNAI1* and *SNAI2* transcripts while only Snail  
178 levels were elevated (Figure S2 D and E). These results confirm that RNA sensing pathways  
179 modulate the expression of various EMT-TFs based on the cell context and could be a  
180 potential mechanism of activation of EMT during RNA viral infections.

### 181 **RIG-I and MDA5 regulate EMT-TFs expression**

182 Since poly (I:C) mounts antiviral response through dsRNA binding proteins RIG-I and MDA5,  
183 we tested if they could induce EMT-TFs expression. Over-expression of MDA5, RIG-I, and  
184 MAVS independently activated *SNAI1* and *SNAI2* but not *ZEB1* (Figure 3A) in MCF-7 cells  
185 while Snail showed activation at protein level (Figure 3B). Thus, it is apparent that these  
186 modulators of antiviral molecules transcriptionally activate the two major EMT-TFs in  
187 addition to mounting an antiviral response. Given that MAVS is crucial in assimilating  
188 upstream signals from the RLRs, we tested if its loss negatively impacts EMT-TFs. In  
189 agreement, MAVS KO A549 cells expressed less Snail (Figure 3C), while ectopic expression  
190 of MAVS elevated the Snail levels (Figures 3 D and E). We further tested if their activation is  
191 restricted upon poly (I:C) transfection, and interestingly, *SNAI2* and *ZEB2* activation were  
192 suboptimal in MAVS KO cells as compared with the WT-cells upon poly (I:C) transfection  
193 (Figure 3F). As expected, MAVS KO cells displayed inadequate antiviral response, as  
194 evident from lower activation of *IFIH1*, *DDX58*, *IFITM3*, and *IFNB1* (Figure S3A). JEV  
195 infection also caused limited activation of *SNAI1* in MAVS KO compared with the WT- cells  
196 (Figure 3G). Further, expression of CARD deletion mutant of MAVS ( $\Delta$ CARD-MAVS) failed  
197 to induce Snail unlike the FL-MAVS (Figure 3 H and I). These results collectively  
198 demonstrated that dsRNA sensing machinery transcriptionally activates EMT-TFs Snail and  
199 Slug. The activation of Snail and Slug by dsRNA sensing machinery raised the vital question  
200 on the point of intervention in their regulation. MAVS coordinates TBK1/IKK $\epsilon$  mediated  
201 phosphorylation of IRF3 that subsequently activates Type I IFN transcription. We tested if  
202 IFN signaling is critical to EMT-TF regulation by treating MCF-7 cells with IFN $\alpha$ -2a. While  
203 this treatment activated ISGs such as IFIT1 and IFITM1, it failed to induce EMT-TFs both at  
204 protein (Figure 3J) and transcript levels (Figure S3 B and C), suggesting that IFN production  
205 is dispensable for the regulation of EMT-TFs during viral infection.

206

207

## 208 **Phosphorylated IRF3 promotes Snail transcription through ISREs**

209 Thus far, our observations suggest that EMT-TFs are regulated by RLR-MAVS, but not by  
210 IFN. It is likely that this regulation might be downstream to MAVS, but upstream to IFN.  
211 Therefore, we focused our studies on IRF3, the key regulator in IFN signalling activated  
212 following RLR-MAVS activation. Ectopic expression of WT-IRF3 in MCF-7 cells failed to  
213 induce EMT-TFs. Nevertheless, phosphomimetic mutant S396E IRF3 (Figure 4A) efficiently  
214 activated both Snail and Slug expression reminiscent of viral infection (Figure 4B). A DNA  
215 binding mutant of IRF3 (DN-IRF3) also failed to induce the two molecules. S396E IRF3  
216 activated *SNAI1* and *SNAI2*, but not *ZEB1* indicating that the regulation is possibly at the  
217 transcriptional level mediated by phosphorylated IRF3 (Figure 4C). In justification of these  
218 observations, only S396E IRF3 but not WT- and DN-IRF3 could strongly induce *IFNB1*,  
219 *IFIT1*, and *IFITM1* (Figure S4A). Consonant with this, we observed a significantly higher  
220 luciferase activity in Snail promoter-luciferase reporter vector (30) upon co-transfection with  
221 S396E-IRF3, but not with WT-IRF3 (Figure 4 D and E), confirming transcriptional regulation  
222 of *SNAI1* by p-IRF3.

223 IRF3 recognizes Type I IFN promoters through interactions with ISRE elements. To verify if  
224 IRF3 regulates *SNAI1* through a similar mechanism, we performed sequence analysis of  
225 *SNAI1* promoter region and identified two potential consensus ISREs (GAAANN) at -1040  
226 and -439 (Figure 4D). Double ISRE mutagenesis rendered the promoter-reporter non-  
227 responsive to phosphomimetic IRF3 and failed to activate luciferase (Figure 4E), suggesting  
228 that p-IRF3 activates *SNAI1* transcription by engaging with these elements. Based on these  
229 results, it is evident that viral RNA receptors RIG-I and MDA5 activate IRF3 that further  
230 promotes *SNAI1* transcription through ISREs in its promoter. Interestingly, our analysis of  
231 *SNAI2* promoter region identified four Type I (GAAANN) and two Type II (AANNNGAA)  
232 putative ISREs (Figure S4B), indicating its possible regulation through a mechanism similar  
233 as in *SNAI1*.

## 234 **NF-κB does not participate in *SNAI1* and *SNAI2* activation**

235 Since NF-κB is a key transcriptional regulator in IFN production, we tested its requirement  
236 for EMT-TF transcription regulated by p-IRF3. TLR4 activation by LPS treatment caused  
237 phosphorylation of IκB (Figure S4C) and strong induction of *IFNB1* but failed to induce  
238 *SNAI1* and *SNAI2*, indicating that their activation by RLRs does not engage NF-κB (Figure  
239 4F). Poly (I:C) activated NF-κB, as evident from phosphorylation of IκB and increased  
240 processing of precursor NF-κB2 (Figure 4G) in agreement with observations made earlier  
241 (31). However, NF-κB inhibitor BAY 11-7082 failed to suppress Snail and Slug levels in cells  
242 treated with poly (I:C) (Figure. 4H). These results demonstrate that NF-κB does not  
243 participate in *SNAI1* and *SNAI2* activation by viral RNA.

## 244 **Ectopic expression of EMT-TFs suppress RNA viral infections**

245 Given that EMT, classically associated with tumor progression and embryogenesis, is  
246 activated by viruses using innate immune response pathway as demonstrated here, it is  
247 likely to have a consequence on the infection. To test this, we ectopically expressed Snail  
248 and Slug in A549 cells, followed by infection with JEV (Figure S5A). Expression of EMT-TFs  
249 imparted dramatic restriction to JEV infection evidenced by a significant drop in intracellular  
250 viral RNA and extracellular titers (Figure 5A) as well as expression of JEV envelope (Figure

251 5B). DENV infection was also substantially impacted by the EMT-TFs (Figure 5 C and D).  
252 The restriction on the virus was evident in MCF-7 cells as well (Figure S5 B-E). Importantly,  
253 EMT-TFs imparted only a limited suppression of viral entry (Figure S5F), indicating that the  
254 viral titer reduction is primarily associated with intracellular restriction.

255 We then studied the universal efficacy of EMT-TFs as antiviral molecules by testing viral  
256 infection in diverse cell types upon their ectopic expression. Both Snail and Slug effectively  
257 conferred resistance against HCV in Huh7.5 cells (Figure S5G) and VSV in A549 cells  
258 (Figure 5E) marked by reduced viral RNA. These results comprehensively demonstrate that  
259 Snail and Slug promote antiviral state against RNA viruses. Next, we investigated if the  
260 transcription activity is critical for the antiviral activities displayed by Snail. Zinc fingers (ZF)  
261 are crucial to the DNA binding property of Snail (Figure 5F) and Slug, and mutations in ZF1  
262 and ZF2 are known to suppress its transcriptional activity (32). As hypothesized, mutant  
263 Snail (C156A C182A) failed to impart any antiviral status to A549 cells against DENV  
264 infection, unlike its wild type form (Figure 5 G and H), indicating that Snail promotes its  
265 antiviral effects through transcriptional reprogramming. Thus, Snail and possibly Slug  
266 suppress viral infection through transcriptional reprogramming of genes involved in the  
267 antiviral program. To test if the depletion of one of the EMT-TFs supports viral infection, we  
268 knocked down Snail (Figure S5I) in MCF-7 cells using siRNA and subsequently infected with  
269 JEV. No significant change in JEV RNA levels (Figure 5I), could be observed upon the  
270 depletion of Snail. Since Snail and Slug exhibited antiviral activity individually when  
271 ectopically expressed, it is possible that absence of Snail could have been replaced by Slug.  
272 Hence, preferably a double knock out, Snail as well as Slug, is required.

### 273 **EMT-TFs activate innate immune response through RLRs**

274 To find out the possible mechanism that contributes to the general virus restriction mediated  
275 by EMT-TFs, we analyzed their influence on the expression of various ISGs. Either of them  
276 activated *IFIT1* robustly and *IFIT3* modestly (Figure 6A). They also activated IFITMs *IFITM1*,  
277 *IFITM2*, and *IFITM3* (Figure 6B), indicating that IFN-mediated signaling activities were  
278 elevated. Interestingly, both *IFIH1* and *DDX58* were up-regulated by Snail and Slug (Figure  
279 6C). Immunoblots confirmed these results and revealed increased phosphorylation of TBK1  
280 and STAT1 in A549 cells expressing these EMT-TFs (Figure 6D). We reasoned that Snail  
281 and Slug could regulate *IFIH1* and *DDX58* as their promoter regions contained canonical E-  
282 boxes (Figure S6A). We verified the possibility of transcriptional regulation of *DDX58* by  
283 Snail and Slug by promoter-reporter assay. Their expression plasmids were co-transfected  
284 with a promoter-reporter construct of *DDX58* in A549 cells. However, no considerable  
285 change was observed in promoter activities, indicating that they do not regulate RIG-I  
286 transcriptionally (Figure S6B). We asked if similar results exist in published transcriptome  
287 studies since Snail and Slug activated innate antiviral signal pathways. Analysis of fourteen  
288 such datasets revealed that many ISGs are frequently up-regulated in EMT induced by  
289 diverse signals (Figure 6E). These results collectively indicate that EMT-TFs impart a strong  
290 innate antiviral response.

### 291 **DISCUSSION**

292 EMT is most eloquently studied in cancer metastasis, embryo development, and wound  
293 healing. Despite the accumulated reports in several distinct conditions, the understanding of  
294 EMT during viral infections is minimal. Earlier reports focused on EMT induction during

295 oncoviral infections, and these studies tried to establish a link between the process and  
296 oncogenesis promoted by these viruses. However, one paradox always stood out. If  
297 oncoviruses induce EMT early during infection in culture models, how would that have  
298 influenced cancer development that takes place several years after the infection? Further,  
299 mounting evidence suggests that EMT promotes metastasis in carcinoma (13). Detection of  
300 EMT or EMT-like process during infection of non-oncoviruses further indicated that EMT  
301 induced during viral infections could instead be a general host response that promotes a  
302 shared outcome. Our study initiated in this background revealed two essential aspects of  
303 EMT. First, it identified a novel mechanism of induction of two key EMT-TFs by a well-  
304 characterized pathway that is best known in coordinating the innate antiviral response.  
305 Second, it uncovered the consequence of the expression of EMT-TFs on viral infection by  
306 revealing their activation of antiviral responses. These findings have added a new dimension  
307 to our understanding of two physiological processes, EMT and antiviral response.

308 RIG-I and MDA5, two cytosolic RNA sensors, are crucial to alerting the cells against strange  
309 RNA signals in the cytoplasm. While RIG-I is known to have specificity for 5'-ppp carrying  
310 ssRNA or dsRNA, MDA5 primarily detects dsRNA. Since IVT generated HCV RNA with its  
311 uncapped 5'-ppp caused substantial induction of *SNAI1* and *SNAI2*, RIG-I is an effective  
312 inducer in this process. On the other hand, MDA5 senses double-stranded replicative forms  
313 common during the phase of active replication, and genomes of dsRNA viruses. Thus, the  
314 evolutionary process has ensured redundancy in this process. Interestingly, a mechanism  
315 that has evolved to activate Type I IFN is also shared to activate EMT-TFs, which in turn,  
316 perpetuate the mechanism itself. Equally impressive is the specificity towards *SNAI1* and  
317 *SNAI2*, leaving out *Twist* and *Zeb1* from this ambit.

318 It is interesting to note that the depletion of Snail did not have any impact on the viral titer  
319 which was expected under normal circumstances considering its antiviral effect. In  
320 agreement, the ectopic expression of the DNA binding mutant of Snail also had little effect  
321 on the viral titer. The most plausible explanation for these observations is the functional  
322 redundancy of EMT-TFs. It is very likely that Slug and possibly the other members of EMT-  
323 TFs are compensating for the loss of Snail, effectively suppressing the viral replication.  
324 Thus, demonstrating more complete roles of these transcription factors in viral infection  
325 would necessitate a multiple knockout system.

326 Our model proposes that EMT-TFs form a loop that helps sustain the antiviral response  
327 through RLRs (Figure 7). While we do not yet completely understand this process's  
328 mechanistic details, we demonstrate that EMT-TFs can modulate the levels of RIG-I and  
329 MDA5. Since it does not appear to be a transcriptional regulation, other possibilities, such as  
330 stabilizing the proteins through post-transcriptional means exist. Ubiquitination is a well-  
331 known mode of activation of both RIG-I and MDA5 (33, 34) and appears to be a strong  
332 possibility. Importantly, the upstream circuit of regulating Snail and Slug expression as well  
333 as that downstream to it regulating RLRs are exclusive to the infected cells as extraneous  
334 IFN had very little effect on the EMT-TFs. It is interesting to note that the mere expression of  
335 these molecules in naïve cells was enough to induce IFN as well as EMT-TF  
336 transcriptionally.

337 IRF3 is a common node for both RNA and DNA viruses. A major mechanism of antiviral  
338 response to DNA viruses is coordinated by the cGAS/STING pathway that senses DNA in  
339 the cytoplasm and activates IRF3 (7, 35), further leading to IFN production. Thus, it is very



340 likely that one of the significant mechanisms of EMT activation during DNA viral infection  
341 involves this pathway, with IRF3 being the common molecule that facilitates the induction of  
342 Snail and Slug during both RNA and DNA viral infections. We tested this hypothesis using  
343 EBV, a  $\gamma$ -herpesvirus with dsDNA as genome that displays a clear tropism for both epithelial  
344 and B cells. Interestingly, the EMT-TFs displayed a strong antiviral effect against EBV, as  
345 measured by decreased *LMP1* transcripts (Figure S5H). However, whether sensing of DNA  
346 by cGAS/STING activates EMT-TFs is an open question. This model suggests that viral  
347 genomes, whether RNA or DNA, are potent inducers of EMT-TFs that play important roles in  
348 sustaining antiviral response. Therefore, the constant presence of viral genomes in  
349 persistent viral infections could result in prolonged expression of EMT-TFs that might, in  
350 turn, collaborate with other factors in promoting cancers in such cases. However, this does  
351 not rule out the possibility of other well-established mechanisms of EMT-TF induction in  
352 parallel. This includes viral proteins that could separately influence pathways such as TGF- $\beta$   
353 and Wnt/ $\beta$ -Catenin. Thus, these complex networks of pathways influencing each other in  
354 dynamic ways would decide the outcome of infection.

355 Type I IFNs are the primary target genes of IRF3 known so far. The discovery that the latter  
356 can regulate *SNAI1* (and most likely *SNAI2*) transcriptionally opens up the possibility of a  
357 much larger role of IRF3 in various other biological events. Recent studies linking the  
358 potential antagonistic effects of RIG-I in cancer progression (36, 37) should be analyzed in  
359 the context of our studies to understand the broader implications of EMT-TFs expressed  
360 under these conditions. Over-expression of IRF3 and its mutants are reported in several  
361 cancers (38-40). Increased activation of TBK1 (TANK binding kinase 1) and IKK $\epsilon$  has been  
362 reported in various cancers (38). On a different note, DNA released from tumor cells or dead  
363 cells can enter neighboring antigen-presenting cells through unknown mechanisms that can  
364 activate STING in them (41). Cancer cells are well known to modulate their immune  
365 molecules in their quest to avoid immune surveillance, and the contribution of EMT to this  
366 cause is well studied (42). In this context, a leading role played by IRF3 in determining the  
367 outcome of the complex signaling networks is conceivable. Certainly, concurrent regulation  
368 and expression of anti-cancerous IFN and pro-cancerous EMT-TFs looks intriguing and  
369 demands more detailed studies. The activation of RLR signaling by Snail and Slug further  
370 suggests that they might assist IRF3 in suppressing cancer progression. Further studies into  
371 the factors that determine the pro-growth or anti-growth effect of these two molecules are  
372 necessary. Nevertheless, a larger role of IRF3 in the overall progression and survival of  
373 cancer cells is quite likely, and our studies provide important clues for the long standing  
374 question in the field of cancer biology.

375 Apart from the two mentioned contributions, our study raises a few critical questions. Our  
376 studies have primarily dealt with EMT-TFs in epithelial cells. However, non-epithelial cells  
377 also express EMT-TFs, and the RLR pathway is fairly conserved across cells, including  
378 specialist cells, and it is likely that the mechanism that we identified is more general and not  
379 restricted to epithelial cells. Another point of future interest is the probably elevated antiviral  
380 state in circulating tumor cells (CTCs) in developing embryos and stem cells. CTCs regulate  
381 the expression of their cell surface receptors in order to evade immune surveillance.  
382 Elevated antiviral state imparted by EMT-TFs could further protect them from possible viral  
383 infections, thereby increasing their probability of survival in circulation. Interestingly, stem  
384 cells are known to be refractory to various viral infections, and the contribution of EMT-TFs  
385 to this status needs special attention. EMT could be a mechanism that could help the cells

386 alter the tropism of viruses. Here, EMT mediated changes in the expression of various host  
387 factors could enforce stringent survival conditions on the virus and could be a ploy by the  
388 cells to limit the spread of the virus. This point is particularly strengthened by the absence of  
389 HCV in liver tissues with higher tumorigenic indices (43). Compromised infection of transited  
390 mesenchymal cells by Measles virus also points in this direction (44). A partial drop in virus  
391 entry following the expression of EMT-TFs in our studies also suggests that EMT might be  
392 accompanied by altered receptor expression rendering a more impermissivity to the cells.

393 Based on the functional outcome in viral infection, which is distinct from the other  
394 established EMTs, we propose virus-induced EMT as the fourth paradigm of EMT that  
395 attributes a fresh dimension to EMT. While the RLR-IRF3 axis may activate EMT in the other  
396 three contexts, its activation is associated with viral infections where it provides a unique  
397 functional outcome. Future studies would provide details of the interplay between the innate  
398 immune signaling and other biological events such as cancer metastasis.

### 399 **CONFLICT OF INTEREST**

400 The authors declare no competing interests.

### 401 **AUTHORS CONTRIBUTION**

402 D.V and K.H.H conceived and designed the project. D.V performed, analyzed, and  
403 interpreted the results of experiments using JEV, DENV and HCV. D.G performed viral entry  
404 and IFN treatment experiments and interpreted the results. Initial experiments on DENV and  
405 JEV were performed in the laboratory of M.K. M.B and A.B designed and executed mice  
406 experiments. D.V and K.H.H analyzed the results of mice experiments. G.K and M.V.V  
407 performed and analyzed EBV related experiments. D.G, A.M, and D.N executed and  
408 interpreted VSV related experiments. D.V assisted K.H.H to write the manuscript.

### 409 **ACKNOWLEDGEMENTS**

410 Special thanks to Mohan Singh Moodu and Amit Kumar for maintaining the logistics needed  
411 for the entire work. We are thankful to Sankar Bhattacharyya for his assistance with  
412 establishing DENV cultures. We thank the contributions made by Vishal Sah, Hitha G Nair,  
413 Poonam Manral and Sriram Kumar in standardization-related experiments. Mohan Singh  
414 Moodu, Farsana S.M. Swetha Jeevan, and Karthika S Nair are acknowledged for cloning  
415 experiments. pUNO vector, pUNO RIG-I, pUNO MDA5, and pUNO IPS-1 (MAVS) were a  
416 kind gift from Dr. C T Ranjit Kumar, THSTI.

### 417 **Funding**

418 This project was partly supported by a grant from the Department of Biotechnology, Govt. of  
419 India (BT/PR21356/MED/30/1779/2016). D.G received fellowships from the Council of  
420 Scientific and Industrial Research, Govt. of India

### 421 **MATERIALS AND METHODS**

#### 422 **Antibodies, reagents, plasmids, cloning, and cell lines**

423 All primary antibodies were purchased from Cell Signaling Technologies, except anti-  
424 flaviviral envelope 4G2 (Merck Millipore),  $\beta$ -Tubulin, and GAPDH (Thermo Fischer), and

425 HCV Core (Abcam). Rabbit polyclonal JEV NS1 antibody was from Dr Manjula Kalia, RCB,  
426 Faridabad. All HRP-conjugated secondary antibodies were procured from Jackson  
427 Immunoresearch. Poly (I:C), BAY 11-7082, PEI, and Human IFN $\alpha$ -2a were purchased from  
428 Sigma Aldrich. *SNAI1* and Scramble siRNA were purchased from Dharmacon, Thermo  
429 Scientific.

430 Mammalian expression vector, pcDNA4/TO, was procured from Invitrogen. All over-  
431 expression constructs were generated using pcDNA4/TO. HA-IRF3 was amplified using  
432 primers and MCF-7 cDNA as template to generate pcDNA4/TO IRF3. Similarly, the DN-  
433 mutant was amplified with specific primers and cloned. Phosphomimetic IRF3 (S396E) was  
434 generated using primers carrying corresponding mutations by overlapping PCR. HA-  
435  $\Delta$ CARD-MAVS was amplified using pUNO MAVS as template and cloned into pcDNA4/TO.  
436 pcDNA4/TO Snail and pcDNA4/TO Slug were generated by amplifying their respective  
437 cDNA clones procured from Thermo Fischer. Zinc finger single (C156A) and double (C156A  
438 C182A) mutants of Snail were generated using pcDNA4/TO Snail as template by  
439 overlapping PCR. Snail\_pGL2 was a gift from Paul Wade (Addgene plasmid # 31694;  
440 <http://n2t.net/addgene:31694>; RRID: Addgene\_31694). Snail promoter-luciferase reporter  
441 construct was used as template to generate pGL2 Snail ISRE mutant promoter construct.  
442 pGL2 DDX58 (RIG-I) promoter-reporter was generated using primers and MCF-7 genomic  
443 DNA as template. All constructs generated in the lab were sequenced to confirm their  
444 integrity. All primers used in the study for generating constructs are listed in Table 1.  
445 Plasmids were prepared from bacterial cells using MN Nucleospin Plasmid DNA kit.

446 MCF-7, A549, and HEK293 were received from ATCC. Vero and PS cells were received  
447 from Dr. Manjula Kalia, RCB, Faridabad. All cells mentioned above were cultured in DMEM  
448 supplemented with 10% FBS, 1X Penicillin-streptomycin, and grown at 37 °C with 5% CO<sub>2</sub>.  
449 Huh7 and Huh7.5 were gifted by Dr. Ralf Bartenschlager and Dr. Charlie Rice, respectively.  
450 They were also cultured in the above media, along with 1X NEAA supplement. A549 Dual<sup>TM</sup>  
451 WT and A549 Dual<sup>TM</sup> MAVS KO (MAVS KO) cells were procured from Invivogen and  
452 cultured according to manufacturer's protocol. These cells were used in experiments  
453 pertaining to the comparison between MAVS KO and its control. All cell lines were tested  
454 negative for mycoplasma by PCR using specific primers (Table 2).

#### 455 **Propagation and purification of viruses**

456 All infection-related experiments were carried out in Bio Safety Laboratory (BSL) level – 2 at  
457 CSIR-CCMB, Hyderabad. Infectious JEV isolate (Vellore strain P20778, genotype 3,  
458 GenBank accession No. AF080251) was a kind gift from Dr. Manjula Kalia, RCB, Faridabad  
459 (45). JEV was propagated in Huh7 cells and incubated for 36-48 hrs. On observation of the  
460 cytopathic effect, the culture supernatants of JEV infected cells were collected and spun at  
461 3500 rpm for 10 min at 4 °C. Cell-free supernatant was passed through 0.2  $\mu$ m filter,  
462 aliquoted, and stored at -80 °C. Plaque assay was performed to determine the viral titer.

463 Dengue virus serotype 2 (DENV2) was a kind gift from Dr. Sankar Bhattacharyya, THSTI,  
464 Faridabad (46). Like JEV, DENV was also propagated and stored at -80 °C. Foci forming  
465 assay was performed to determine DENV titer. Hepatitis C Virus 2a was propagated in  
466 human hepatoma cell line, Huh7.5 (47, 48). HCV titer was calculated by real-time qRT-PCR  
467 using the absolute quantification method. EBV was prepared from B95-8 cells by inducing  
468 the lytic cycle in the BSL-2 laboratory of Dr. Mohanan Valiya Veetil (49). Briefly, B95-8 cells

469 were treated with 20 ng/mL of TPA and incubated for 5 days at 37 °C. The supernatant was  
470 filtered and ultracentrifuged at 70000 rpm for 2 hrs at 4 °C, and the viral pellet was dissolved  
471 in PBS, and the virus titer was determined (50).

472 Vesicular stomatitis virus (VSV) (Indiana strain) was a kind gift from Dr. Debasis Nayak, IIT  
473 Indore. VSV was propagated in Vero cells at 0.01 MOI. When 50% cytopathic effect (CPE)  
474 was observed, the culture supernatant was collected and centrifuged at 1400 × g for 10 min  
475 at 4 °C. Debris free supernatant was filtered through a 0.2 µm membrane filter. The clarified  
476 supernatant was then aliquoted and stored at -80 °C. Plaque assay was performed to  
477 determine the VSV titer.

#### 478 **Infection and quantification of viruses**

479 For JEV infection, cells were seeded to reach 60% confluency. Infection was carried out  
480 using DMEM without antibiotics. For JEV infection, cells were infected with JEV at 0.1 MOI  
481 for 2 hrs in DMEM. Simultaneously, the mock infection was also set. 2 hpi, the inoculum was  
482 removed, and cells were washed twice with PBS and replenished with cDMEM containing  
483 10% FBS, 1X Penicillin-Streptomycin, and incubated at 37 °C for 48 hrs. Plaque assay was  
484 carried out to determine the JEV titer (51). Briefly, PS cells were seeded in a 6-well plate to  
485 form monolayer. Serial dilution of the virus was performed in DMEM. The monolayer was  
486 inoculated with serially diluted virus inoculum and incubated at 37 °C for 1 hr with gentle  
487 shaking. After incubation, the inoculum was removed and washed once with PBS. The  
488 infected monolayer was overlaid with overlay media (2X cDMEM and 2% Low melting  
489 agarose (LMA) in 1:1 ratio). The plates were incubated for 3-5 days until plaques were  
490 visible. Cells were fixed with 10% formaldehyde and stained with Crystal violet. Plaques  
491 were counted from each dilution, and the titer was calculated and represented as pfu/mL.

492 Similarly, for DENV infection, 0.5 MOI was used, and cells were incubated with inoculum for  
493 4 hrs, and the protocol mentioned above was followed. Mock and DENV infected cells were  
494 incubated at 37 °C for 72 hrs. Cells and supernatant were collected post-infection. Foci  
495 forming assay was carried out to determine DENV titer (46). Vero cells were seeded in a 12-  
496 well plate to form monolayer. The serially diluted virus was inoculated onto monolayers and  
497 incubated at 37 °C for 4 hrs with gentle shaking. The inoculum was removed, and overlay  
498 media (2X cDMEM and 2% Carboxymethylcellulose (CMC) in ratio 1:1) was added to cover  
499 the monolayer, and the cells were incubated at 37 °C for 5-6 days. Overlay media was  
500 removed, and cells were fixed with 4% Formaldehyde. Cells were washed with PBS to  
501 remove Formaldehyde traces and permeabilized with PBS containing 0.1% Triton-X 100.  
502 Cells were then blocked with 2% BSA prepared in PBS at room temperature for 1 hr. Cells  
503 were then incubated with mouse anti-flaviviral specific envelope antibody (4G2) (1:2000)  
504 overnight at 4 °C. Following this, HRP-conjugated anti-mouse antibody (1:5000) was added  
505 to cells and incubated at room temperature for 2 hrs. After three washes with PBS, the foci  
506 were developed using TMB substrate. Foci were developed and visualized under white light  
507 illuminator. Foci were counted, and the DENV titer was calculated as represented as ffu/mL.

508 For determining HCV titer in the supernatant, RNA was prepared by the Trizol method from  
509 cell-free viral supernatant. cDNA was prepared by reverse transcription using Primescript  
510 Reverse transcriptase (Takara) and HCV specific RT primer (Table 2). 5'UTR of HCV 1b  
511 was used as the standard to determine the HCV copies present in the supernatant.  
512 Quantitative real-time PCR was set for prepared cDNA and serially diluted standard (copy

513 number was calculated and diluted from  $10^8$  to  $10^3$ ) using SYBR Green mastermix (Takara)  
514 and HCV specific PCR primers in LightCycler 480 instrument (Roche). By absolute  
515 quantification method, a standard curve was prepared for standards, and copy number of the  
516 unknown sample was calculated and represented as copies/mL (52).

517 For VSV infection, cells were seeded and infected with VSV at 0.1 MOI in PBS with  $MgCl_2$   
518 and  $CaCl_2$  for 1 hr with shaking every 10 minutes. Virus inoculum was removed, and  
519 cDMEM was added. Cells were incubated at 37 °C for 18 hrs. All mock and virus-infected  
520 cells and their supernatants were harvested at specified time points and collected for RNA or  
521 protein work. VSV titer was determined by plaque assay with a slight modification in the  
522 protocol used for JEV. Vero cells were seeded in a 6-well plate to form confluent monolayer.  
523 Serially diluted virus inoculum in PBS with  $MgCl_2$  and  $CaCl_2$  for 1 hr with shaking at every 10  
524 minutes. The inoculum was removed and washed with PBS. Cells were overlaid with 0.8%  
525 overlay media (2X cDMEM and 1.6% low melting agarose) and incubated at 37 °C for three  
526 days until clear plaques were visible. Cells were fixed with 10% Formaldehyde, followed by  
527 the removal of overlay media. Fixed cells were then washed with PBS and stained with  
528 Crystal violet stain (0.1% Crystal violet, 0.65 g  $Na_2HPO_4$ , 0.4 g  $NaH_2PO_4$ , 90 ml  $H_2O$ , 10 ml  
529 37% Formaldehyde). Once plaques are visible, the stain was removed, and plates were  
530 washed with running water. Plaques were counted, and titer was represented as pfu/ml.

### 531 **JEV infection in mice**

532 All *in vivo* experiments were performed on ten-day-old BALB/c mice who were always  
533 housed with their mothers under pathogen-free and climate-controlled conditions with 12-hrs  
534 light/dark cycle at a constant temperature of  $25 \pm 2$  °C and relative humidity  $60 \pm 10\%$ . For  
535 experiments, pups of either sex were randomly divided into two groups: Sham-treated and  
536 JEV-infected. Mice belonging to the JEV-infected group were injected with  $3 \times 10^5$  PFU of  
537 GP-78 strain intraperitoneally, while an equal amount of sterile PBS was injected into the  
538 sham-treated group (53). Infected pups, along with sham-treated animals, were euthanized  
539 on day seven post-infection after the encephalitis symptoms appeared (54, 55). Brain and  
540 liver were excised after transcatheter perfusion of anesthetized animals with ice-cold 1X PBS,  
541 and thus obtained tissue samples were used for RNA work. All experiments conducted were  
542 approved by the Animal Ethics Committee of National Brain Research Centre (Approval no –  
543 NBRC/IAEC/2017/130) and were in accordance with the guidelines of the Committee for the  
544 Purpose of Control and Supervision of Experiments on Animals (CPCSEA), Ministry of  
545 Environment and Forestry, Government of India.

### 546 **Transfections, treatments, and infection**

547 For poly (I:C) transfections, cells were seeded to reach 80% confluency. Transfection mix  
548 containing OptiMEM-Lipofectamine 3000-poly (I:C) was prepared according to the  
549 manufacturer's protocol and added to cells and incubated for 6-8 hrs. After incubation, the  
550 transfection mix was removed, and cDMEM was added and further incubated for 16-18 hrs.  
551 24 hpt, mock (PBS), and poly (I:C) transfected cells were harvested and collected for RNA or  
552 protein work.

553 For the poly (I:C) and inhibition experiment, the above protocol was followed. After 22 hrs of  
554 poly (I:C) treatment, spent media was removed. cDMEM supplemented with DMSO or BAY

555 11-7082 (20 $\mu$ M) was added to poly (I:C) transfected cells continued for 2 hrs accounting for  
556 a total of 24 hrs of incubation.

557 For LPS treatment, cells were seeded to reach 80% confluency. Spent media was removed,  
558 and fresh cDMEM containing either PBS (vehicle) or LPS (1  $\mu$ g/mL) was added and  
559 incubated for 6 hrs. Cells were harvested and used for RNA or protein studies.

560 For IFN $\alpha$  treatment, cells were seeded to reach 70% confluency. Spent media was removed,  
561 and fresh cDMEM containing either PBS (vehicle) or 50 ng/mL of IFN $\alpha$  was added and  
562 incubated for 24 hrs. Cells were harvested and used for RNA or protein work.

563 For EMT-TFs over-expression and infection studies, Cells were seeded to reach 60%  
564 confluency. Snail and Slug over-expression vectors, along with empty vector, were  
565 transfected using Lipofectamine 3000 according to the manufacturer's protocol. 8 hrs post-  
566 transfection, the transfection mix was removed, and cDMEM was added. 24 hpt, cells were  
567 infected with viruses at mentioned MOI. JEV at 0.1 MOI, DENV at 0.5 MOI, HCV at 0.5 MOI,  
568 and VSV at 0.1 MOI. 48 hpi, mock, and virus-infected cells were harvested, except for HCV  
569 at 72 hpi. Viral supernatants were collected to determine the extracellular titer as mentioned  
570 above, while intracellular titer was quantified by real-time qRT-PCR using virus-specific  
571 primers (Table 2).

572 For EBV, an equal number of cells were plated the day before transfection. Cells were  
573 transfected with over-expression constructs using 1  $\mu$ g/ $\mu$ L PEI (Sigma) and incubated for 5  
574 hrs at 37 °C with subsequent media change. Transfected cells were cultured for 48 hrs and  
575 then infected with EBV for 2 hrs. 48h post EBV infection, cells were harvested for RNA  
576 isolation.

### 577 **Immunoblotting**

578 For protein work, cells harvested were washed with ice-cold PBS supplemented with 1mM  
579 PMSF. Cells were lysed using a mild NP-40 lysis buffer and incubated on ice for 10 min with  
580 gentle mixing. Lysed samples were centrifuged at 13000 rpm for 15 min at 4 °C. The clarified  
581 supernatant was collected and used as a crude protein lysate. All lysates were quantified by  
582 BCA method. Equal quantities of lysates were loaded on SDS-PAGE, electrophoresed, and  
583 transferred onto activated PVDF membrane by wet transfer method. The membrane was  
584 blocked and probed for respective molecules with primary and HRP conjugated secondary  
585 antibodies. Blots were developed by classical method autoradiography. For DENV and JEV  
586 envelope protein, the lysates were mixed with sample loading dye without  $\beta$ -  
587 Mercaptoethanol and loaded onto SDS PAGE.

### 588 **cDNA synthesis and real-time quantitative RT-PCR**

589 For all RNA work, cells were harvested were washed with ice-cold PBS. Total RNA was  
590 isolated using MN Nucleospin RNA kit (Takara). Equal quantities of RNA were reverse  
591 transcribed using Primescript Reverse transcriptase and random hexamers (Takara). 50-100  
592 ng of cDNA was used for quantification using SYBR Green mastermix (Takara) in Lightcycler  
593 480 instrument (Roche). All virus and host-specific transcripts were normalized to GAPDH.  
594 By relative quantification method,  $\Delta\Delta$  Cp (crossing point) was calculated, and fold change  
595 ( $2^{-(\Delta\Delta C_p)}$ ) in comparison to vector-transfected and infected control cells is represented in the  
596 graphs.

597 For EBV quantification, total RNA from Snail and Slug transfected, and EBV infected A549  
598 cells was extracted using TRI Reagent (Sigma) and treated with DNase (Promega). Equal  
599 quantities of total RNA were used for cDNA synthesis using High Capacity cDNA reverse  
600 transcription kit (Applied Biosystems). Real-time quantitative RT-PCR was performed using  
601 EBV *LMP1* gene-specific primers and *GAPDH*, Power SYBR green mastermix (Applied  
602 Biosystems) in Applied Biosystems 7300 Real-Time PCR instrument. Fold change was  
603 calculated as mentioned above. The list of primers used in qRT-PCR is given in Table 2.

#### 604 **Luciferase assay**

605 For luciferase reporter assays, cells were co-transfected with either IRF3 WT or IRF3 S396E  
606 and Snail promoter WT/ISRE mutant reporter construct, along with pRL-CMV vector as  
607 normalization control using Lipofectamine 3000 (Invitrogen). 30 hpt, cells were harvested  
608 and proceeded with Dual luciferase assay (Promega) according to the manufacturer's  
609 protocol in a luminometer. Firefly and Renilla luminescence readings were noted. All Firefly  
610 readings were normalized with respective Renilla reading. The obtained (F/R) ratio was  
611 normalized to empty vector-transfected F/R ratio, and relative change in the F/R ratio was  
612 calculated.

613 For DDX58 promoter assay, Snail/Slug over-expression constructs were co-transfected with  
614 pGL2 DDX58 Firefly luciferase reporter construct and pRL-CMV vector as mentioned above.  
615 The relative F/R ratio calculated was used to make a graphical representation.

#### 616 **Metadata analysis of transcriptome profiles**

617 For metadata analysis of transcriptome profiles, fourteen different EMT induced  
618 transcriptome profiles were retrieved from GEO database. TNF or TGF- $\beta$  induced profiles  
619 (GSE24202, GSE12548 42 hrs, and GSE12548 60 hrs), EMT-TFs over-expression profiles  
620 (GSE58252, GSE43495, GSE24202\_Snail, GSE24202\_GSC and, GSE24202\_TWIST),  
621 spheroid based EMT profiles (GSE14773 and GSE28799), and other all category EMT  
622 profiles (GSE24261, GSE23655, GSE22010 and, GSE18070) were used for this metadata  
623 analysis. GEO2R was used to identify genes involved in cellular innate antiviral immune  
624 response with at least 1.5-fold and p-value <0.5. Such a list of genes was prepared from all  
625 fourteen profiles, and heatmap was generated.

#### 626 **Graphs and statistical analysis**

627 Statistical significance was calculated by the paired-end, two-tailed Student's t-test method.  
628 All experiments were conducted in a minimum of three independent rounds, and averaged  
629 values are represented as scatter plots with bar graphs (depicting individual values of  
630 independent experiments). Error bars are representations of the mean  $\pm$  SEM. All graphs  
631 were prepared using GraphPad Prism version 8.0.2. Statistical significance is represented as  
632 \*, \*\*, and \*\*\* for p<0.05, p<0.01 and p<0.005 respectively.

#### 633 **FIGURES**

634

635

636

637 **Figure 1**

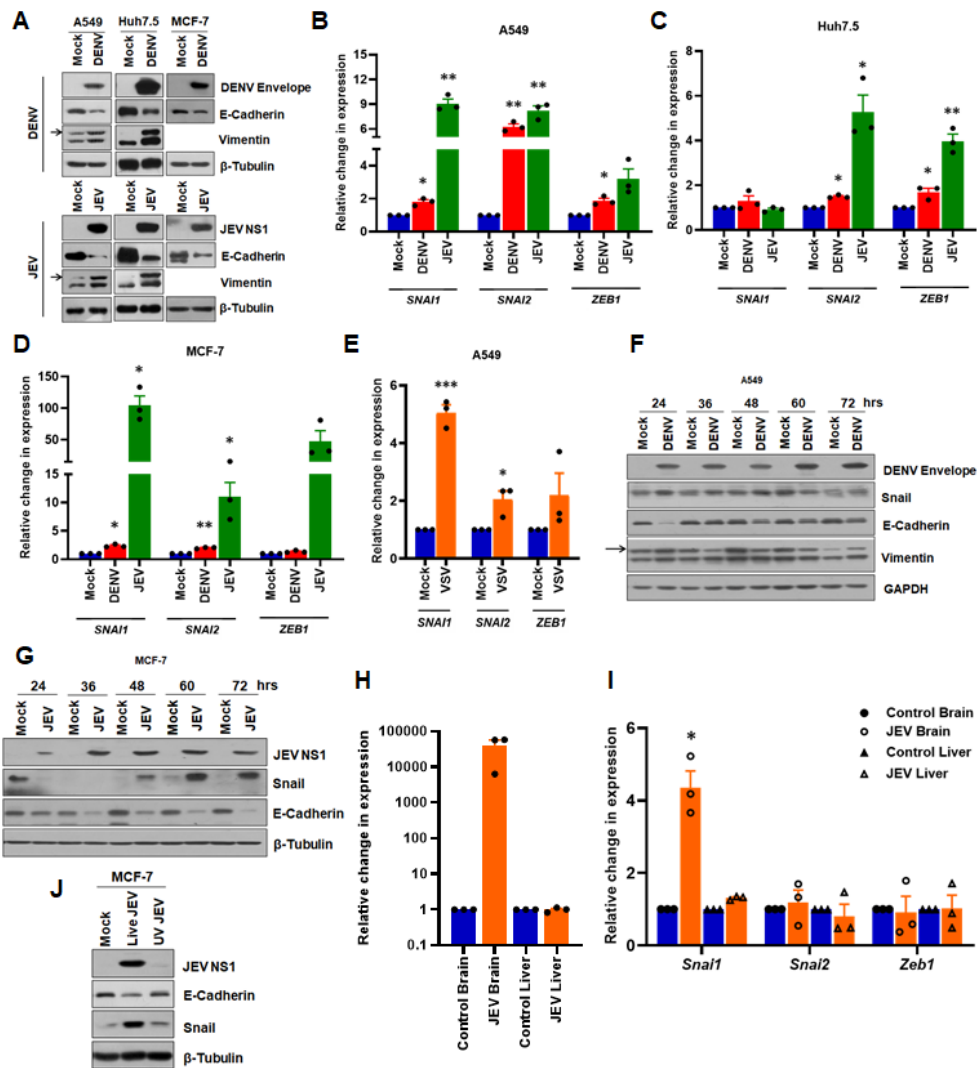

638

639 **Figure 1. Non-oncoviruses induce EMT:** (A) Immunoblots of DENV and JEV infected  
 640 A549, Huh7.5, and MCF-7 cells. Cells were infected with either JEV at 0.1 MOI for 48 hrs or  
 641 DENV at 0.5 MOI for 72 hrs. Mock and virus-infected cells were lysed, electrophoresed, and  
 642 blotted for respective molecules. (B - D) Real-time qRT-PCR analysis of panel (A) samples,  
 643 quantified for *SNAI1*, *SNAI2*, and *ZEB1* transcripts and normalized against *GAPDH*. (E)  
 644 *SNAI1*, *SNAI2*, and *ZEB1* transcripts quantified in mock and VSV infected A549 cells by  
 645 real-time qRT-PCR and normalized to *GAPDH*. (F) Time kinetics of DENV infected A549  
 646 cells immunoblotted for DENV envelope and EMT markers at indicated time points. Infection  
 647 was performed as indicated in (A). (G) Time kinetics of EMT in MCF-7 infected with JEV for  
 648 specified time points by immunoblotting. (H & I) Real-time PCR analysis of control and JEV  
 649 infected mice tissues. *JEV NS3* levels (H) were quantified from the dissected brain and liver  
 650 of control and JEV infected mice. Simultaneously, *Snai1*, *Snai2*, and *Zeb1* transcripts (I)  
 651 were also quantified and normalized to *ActB*. (J) Immunoblot analysis of MCF-7 cells  
 652 infected with either mock or live or UV-inactivated JEV for 48 hrs and probed for JEV NS1,  
 653 E-Cadherin, Snail, and β-Tubulin.



654 **Figure 2**

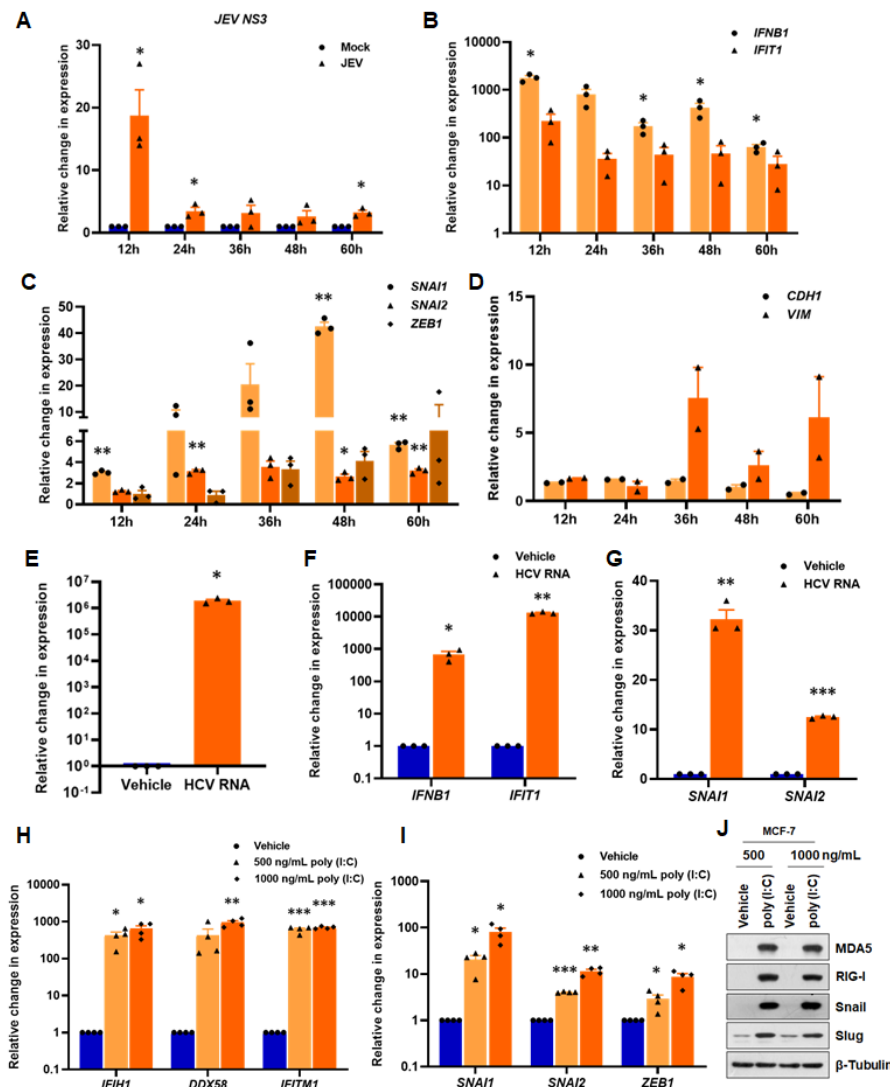

655

656 **Figure 2: EMT-TFs are activated by viral RNA:** (A - D) RNA prepared from mock or JEV  
 657 infected MCF-7 was transfected into MCF-7 cells, and cells were harvested at indicated time  
 658 points (mock and JEV cellular RNA pool designated as mock and JEV). RNA isolated from  
 659 transfected cells was reverse transcribed and analyzed for (A) *JEV NS3* levels, (B) antiviral  
 660 genes, *IFNB1* and *IFIT1*, (C) EMT-TFs, *SNAI1*, *SNAI2* and *ZEB1*, and (D) EMT markers,  
 661 *CDH1* and *VIM* transcripts were quantified by real-time qRT-PCR. *GAPDH* was used as the  
 662 normalization control. (E - G) Real-time qRT-PCR of MCF-7 transfected with purified IVT  
 663 HCV RNA for 48 hrs. (E) *HCV RNA* was quantified from vehicle and IVT HCV RNA  
 664 transfected MCF-7 cells. Simultaneously, innate immune genes, *IFNB1* and *IFIT1* (F), and  
 665 EMT-TFs, *SNAI1* and *SNAI2* (G) were also quantified. All transcripts were normalized to *β*-  
 666 *Tubulin* mRNA. (H - J) Poly (I:C) treatment of MCF-7 by transfection. (H) Antiviral genes,  
 667 *IFIH1*, *DDX58*, and *IFITM1*, (I) EMT-TFs, *SNAI1*, *SNAI2*, and *ZEB1*, were quantified by real-  
 668 time qRT-PCR, and relative change in expression with vehicle transfected cells was  
 669 calculated. *GAPDH* was used as the normalization control. (J) Immunoblots of poly (I:C)  
 670 transfected MCF-7 cells.

671 **Figure 3**

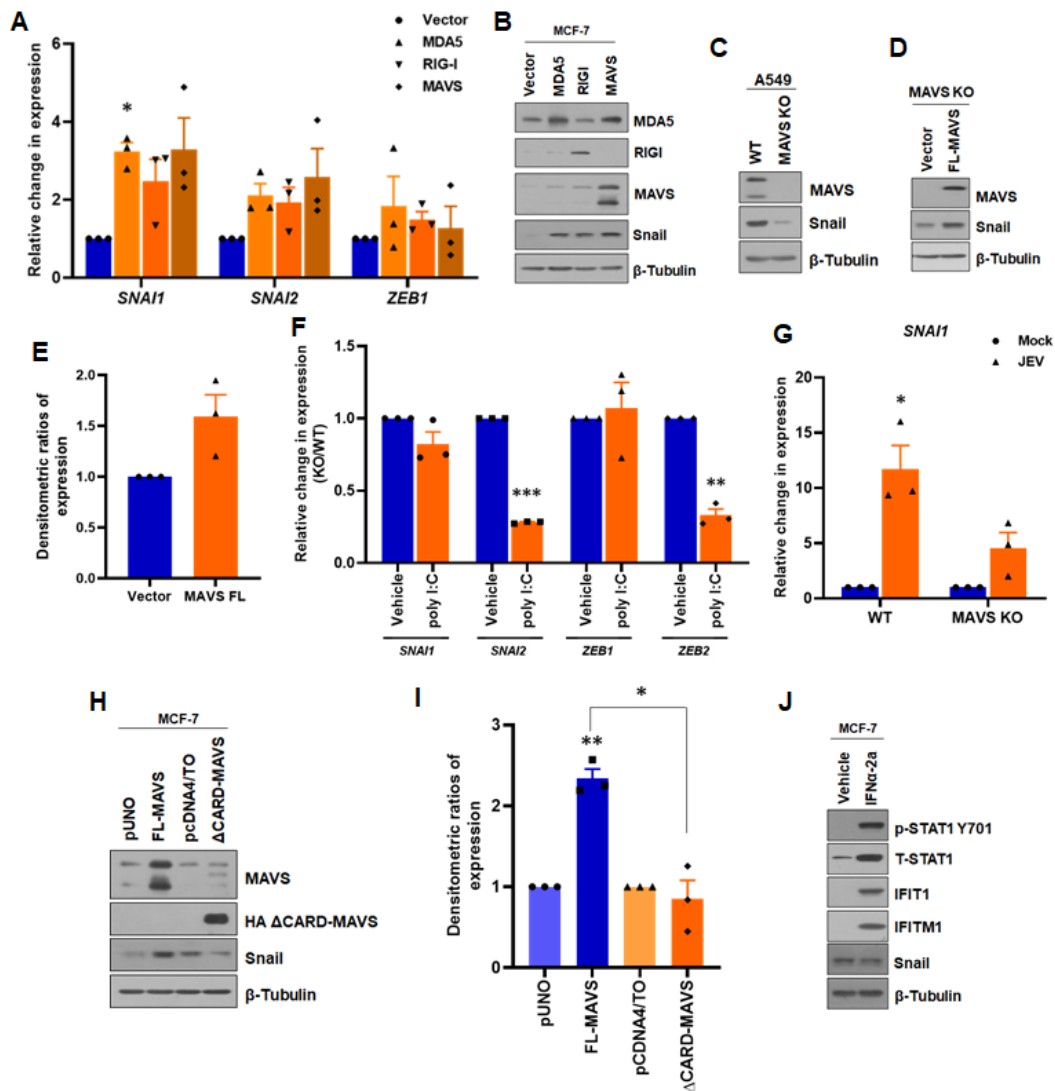

672

673 **Figure 3: RLRs regulate EMT-TFs expression:** (A & B) MDA5, RIG-I, and MAVS over-  
 674 expression in MCF-7 cells. Real-time qRT-PCR of *SNAI1*, *SNAI2*, and *ZEB1* in over-  
 675 expressed cells. (A) in comparison to vector-transfected cells. *GAPDH* was used as the  
 676 normalization control. (B) Immunoblots for MDA5, RIG-I, MAVS, Snail, and  $\beta$ -Tubulin,  
 677 confirming over-expression and EMT-TFs activation. (C) Snail expression in A549 MAVS KO  
 678 was analyzed by immunoblotting. (D & E) Immunoblots of MAVS and Snail in MAVS KO  
 679 A549 transfected with FL-MAVS construct. Densitometry. (E) for Snail expression  
 680 normalized to  $\beta$ -Tubulin from three independent experiments. (F) Effect of poly (I:C)  
 681 treatment on EMT-TFs, *SNAI1*, *SNAI2*, *ZEB1*, and *ZEB2* in MAVS KO A549, as compared to  
 682 WT cells. (G) Effect on *SNAI1* in mock and JEV infected MAVS KO A549, in comparison  
 683 with control cells. *GAPDH* was used as the normalization control. (H) Change in Snail  
 684 expression upon  $\Delta$ CARD-MAVS over-expression.  $\Delta$ CARD-MAVS and full length (FL) were  
 685 transfected into MCF-7 and checked for Snail by immunoblotting. (I) Densitometry of Snail  
 686 expression normalized to  $\beta$ -Tubulin of the panel (H). (J) Immunoblots of IFN $\alpha$ -2a treated  
 687 MCF-7 cells for the detection of EMT-TFs.

688 **Figure 4**

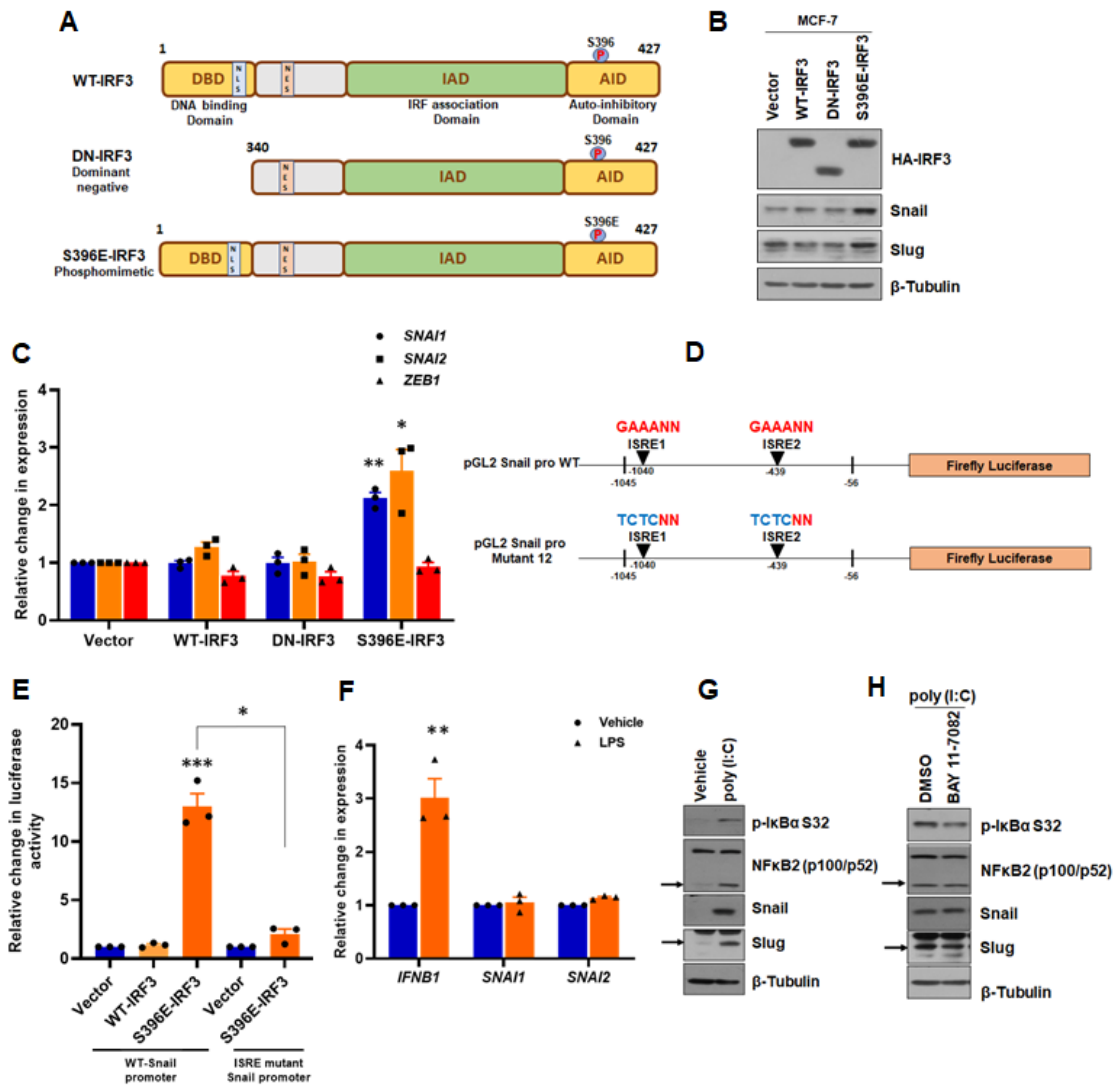

689

690 **Figure 4: Phosphorylated IRF3 regulates *SNAI1* and *SNAI2* transcription: (A)**  
 691 **Schematic representation of WT-IRF3 and its mutants DN and phosphomimetic S396E. (B)**  
 692 **Immunoblot analysis of EMT-TFs in MCF-7 over-expressing the three IRF3 forms. (C)**  
 693 **Quantitation of *SNAI1*, *SNAI2*, and *ZEB1* from panel (A) by real-time qRT-PCR, normalized**  
 694 **to *GAPDH*. (D) Promoter analysis of Human Snail for putative ISRE in pGL2 Snail promoter**  
 695 **construct. Two putative ISRE identified in the promoter region are indicated in the upper**  
 696 **schematic while the lower demonstrates their mutant sequences pGL2 Snail ISRE mutant**  
 697 **(GAAANN to TCTCNN) was created by site-directed mutagenesis at mentioned positions.**  
 698 **The coordinates are with reference to TIS. (E) Dual-luciferase assay in MCF-7 cells co-**  
 699 **transfected with WT- or S396E- IRF3 and WT or ISRE mutant Snail promoter-reporter**  
 700 **constructs. pRL-CMV vector was used as the normalization control. Relative F/R ratios of**  
 701 **luciferase activity are represented in the graph. (F) Real-time qRT-PCR of *IFNB1*, *SNAI1*,**  
 702 **and *SNAI2* transcripts in LPS treated MCF-7 normalized to vehicle-treated cells. GAPDH**  
 703 **was used as the normalization control. (G) NF- $\kappa$ B activation upon poly (I:C) treatment. MCF-**  
 704 **7 cells were treated with 500 ng/mL poly (I:C) as mentioned in Figure 2. NF- $\kappa$ B pathway**

705 molecules were analyzed by immunoblotting, and  $\beta$ -Tubulin was used as the loading control.  
706 **(H)** Effect of NF- $\kappa$ B inhibitor, BAY 11-7082 on EMT-TFs. MCF-7 cells were treated with poly  
707 (I:C) for 22 hrs, followed by inhibition with 20  $\mu$ M BAY11-7082 or DMSO for 2 hrs analyzed  
708 by immunoblotting for Snail and Slug.

709

710

711

712

713

714

715

716

717

718

719

720

721

722

723

724

725

726

727

728

729

730

731

732

733

734

735 **Figure 5**

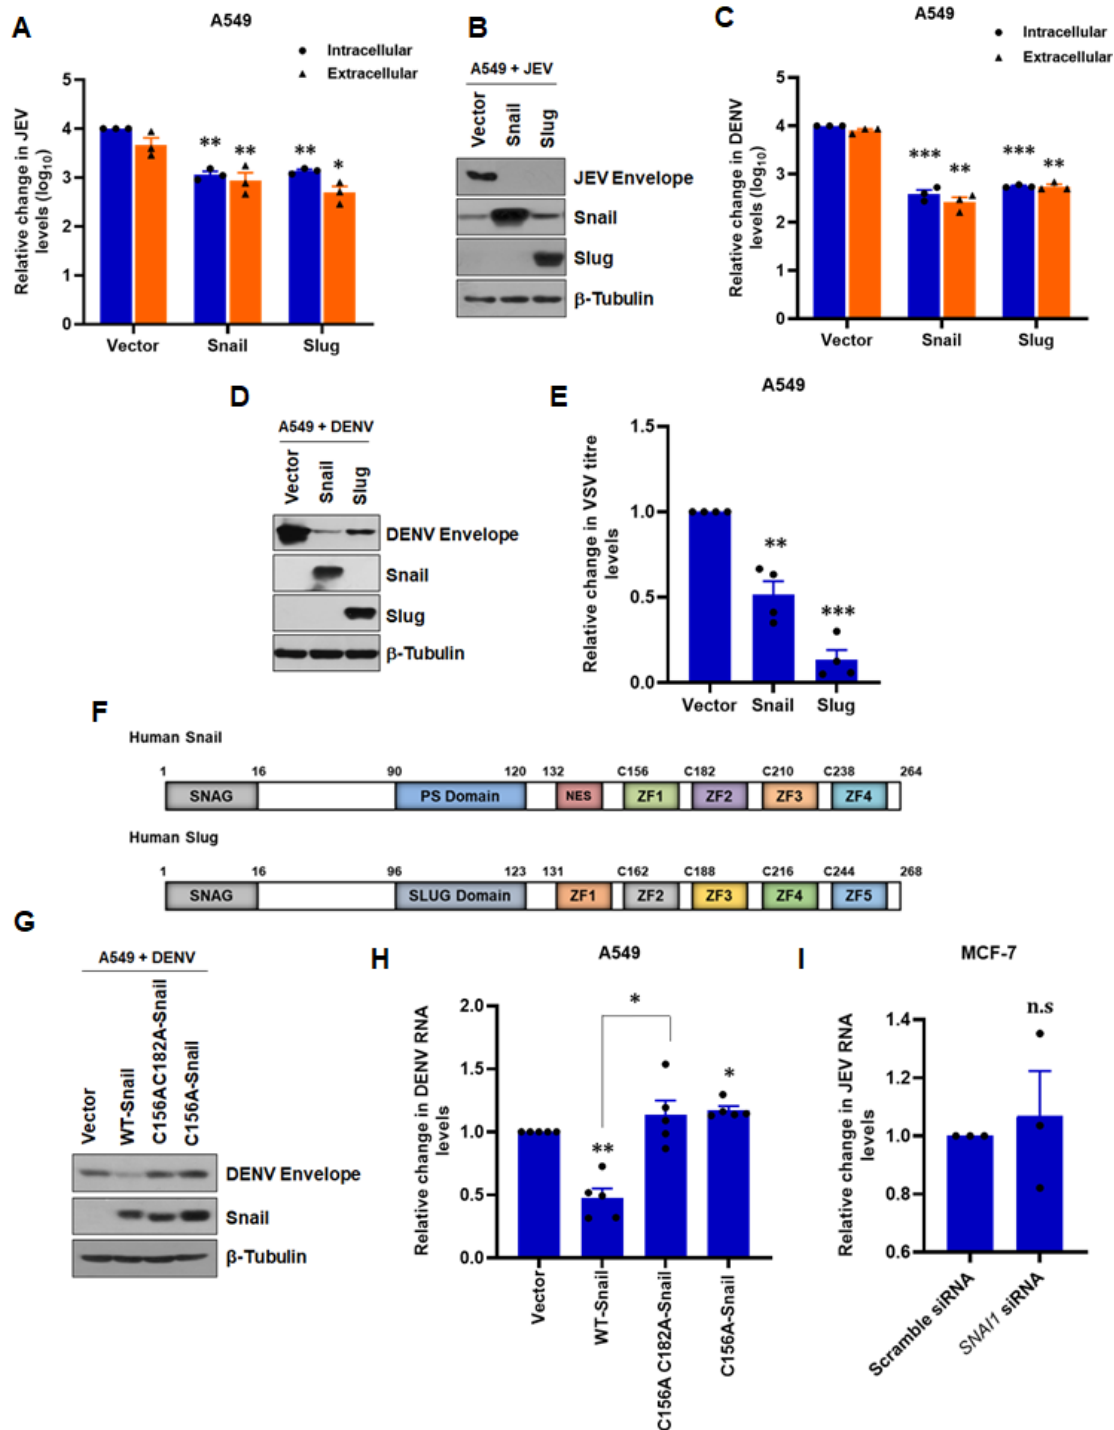

736

737 **Figure 5: EMT-TFs suppress viral infections through its DNA binding activity:** (A) A549  
738 cells were transfected with Snail/Slug/empty vector, followed by JEV infection for 48 hrs.  
739 Supernatants and cells were harvested from infected cells and assessed for extracellular  
740 and intracellular titer by plaque assay and real-time qRT-PCR, respectively. (B) Immunoblot  
741 analysis of panel (A) samples tested for JEV envelope and confirmation of over-expression.  
742 (C) DENV infection on A549 cells transfected with EMT-TFs constructs, as mentioned in the

743 experimental setup for **(A)**. Extracellular titer measured by focus forming assay and  
744 intracellular titer by real-time qRT-PCR. **(D)** Confirmation of DENV infection and over-  
745 expression in samples from panel **(C)** by immunoblotting. **(E)** VSV infection of A549 cells  
746 transfected with Snail or Slug constructs. 18 hpi supernatant was collected and assayed for  
747 extracellular titer by plaque assay. **(F)** Schematic representation of DNA binding domains in  
748 Human Snail and Slug. **(G)** The importance of the DNA binding activity of Snail analyzed by  
749 immunoblotting of A549 cells expressing either WT- or double (C156A C182A) or single  
750 mutant (C156A)- Snail followed by DENV infection. **(H)** Real-time qRT-PCR of the panel **(G)**  
751 samples quantified for intracellular DENV RNA levels normalized to *GAPDH*. **(I)** MCF-7 cells  
752 were transfected with either 250 nM *SNAI1* siRNA or scramble using Lipofectamine 3000 for  
753 24 hrs. Following transfection, cells were either mock or JEV infected at 0.1 MOI for 48 hrs.  
754 Cells were harvested and quantitated for intracellular JEV RNA levels by real-time qRT-  
755 PCR.

756

757

758

759

760

761

762

763

764

765

766

767

768

769

770

771

772

773

774

775

776 **Figure 6**

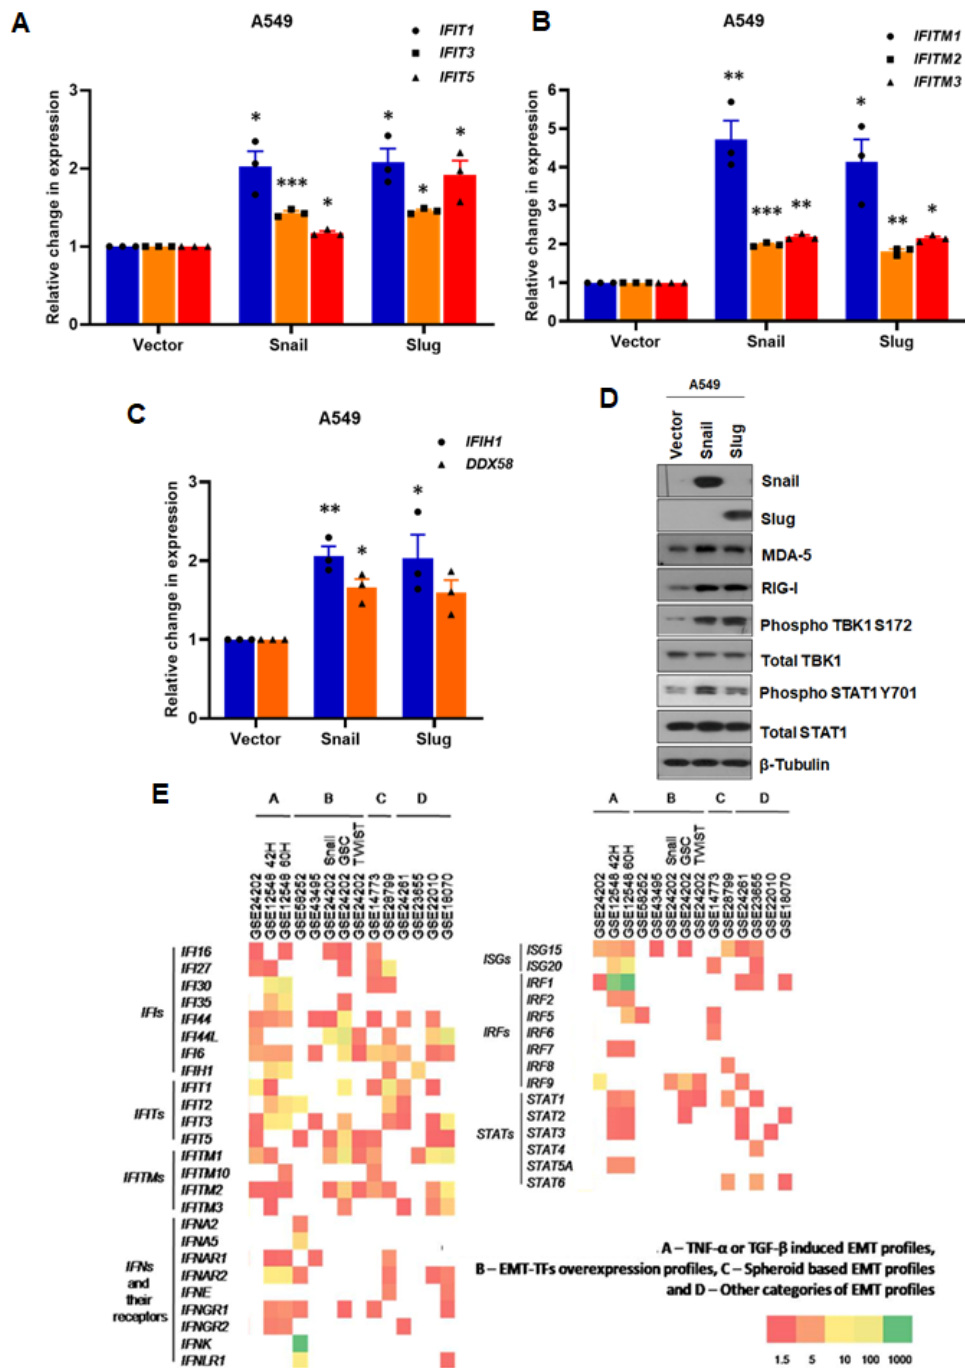

777

778 **Figure 6: EMT-TFs activate cellular antiviral innate immune response: (A-C)** A549 cells  
 779 were transfected with Snail/Slug/vector using Lipofectamine 3000 and were harvested 72  
 780 hpt. Real-time qRT-PCR of IFITs, *IFIT1*, *IFIT3*, and *IFIT5* (A), IFITMs, *IFITM1*, *IFITM2*, and  
 781 *IFITM3* (B), and RLRs, *IFIH1* and *DDX58* (C) in EMT-TFs over-expressed cells, normalized  
 782 to *GAPDH*. (D) Cells from the above experiment were lysed, electrophoresed, and blotted for  
 783 mentioned molecules. (E) Metadata analysis of fourteen EMT induced transcriptome profiles  
 784 for cellular antiviral innate immune genes analyzed by GEO2R.

785 **Figure 7**

786

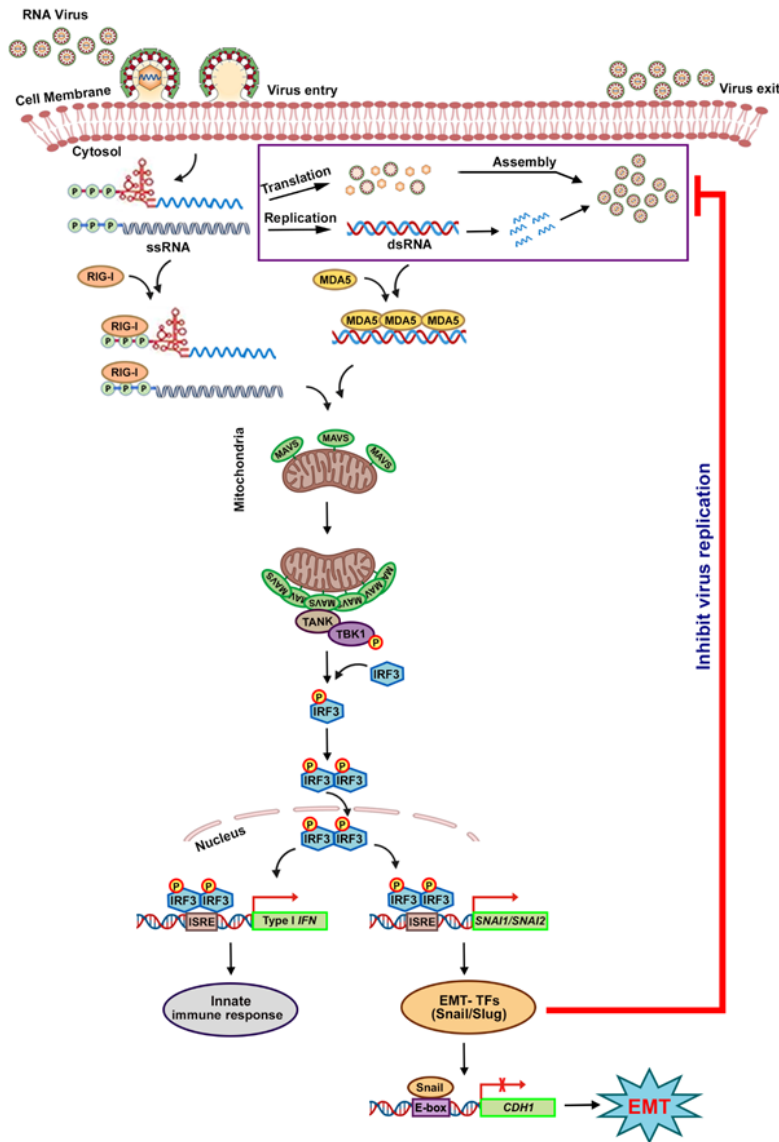

787

788 **Figure 7: Model illustrating a novel mechanism for activation of EMT-TFs during RNA**  
 789 **viral infections:** After the virus entry into the cell either through endocytosis or fusion, the  
 790 viral genome is sensed by RLRs, RIG-I, and MDA5, which transmits signals to MAVS  
 791 localized on mitochondria, leading to oligomerization of MAVS. This recruits TANK and  
 792 TBK1 (TANK binding kinase 1) onto oligomerized MAVS, resulting in activation of TBK1 by  
 793 TANK through phosphorylation at S172. Phosphorylated TBK1 activates IRF3 through a  
 794 series of phosphorylations at the C-terminus of IRF3, resulting in dimerization and  
 795 subsequent nuclear translocation of IRF3, leading to transcriptional activation of *SNAI1* and  
 796 possibly *SNAI2* as in the case of Type I IFN promoter activation. Snail and Slug, on the one  
 797 hand, elevates ISGs and, on the other, represses E-cadherin, resulting in EMT. Elevated  
 798 antiviral genes by Snail and Slug restrict viral replication, thereby controlling the spread of  
 799 infection.



800 SUPPLEMENTARY FIGURES

801 Figure S1

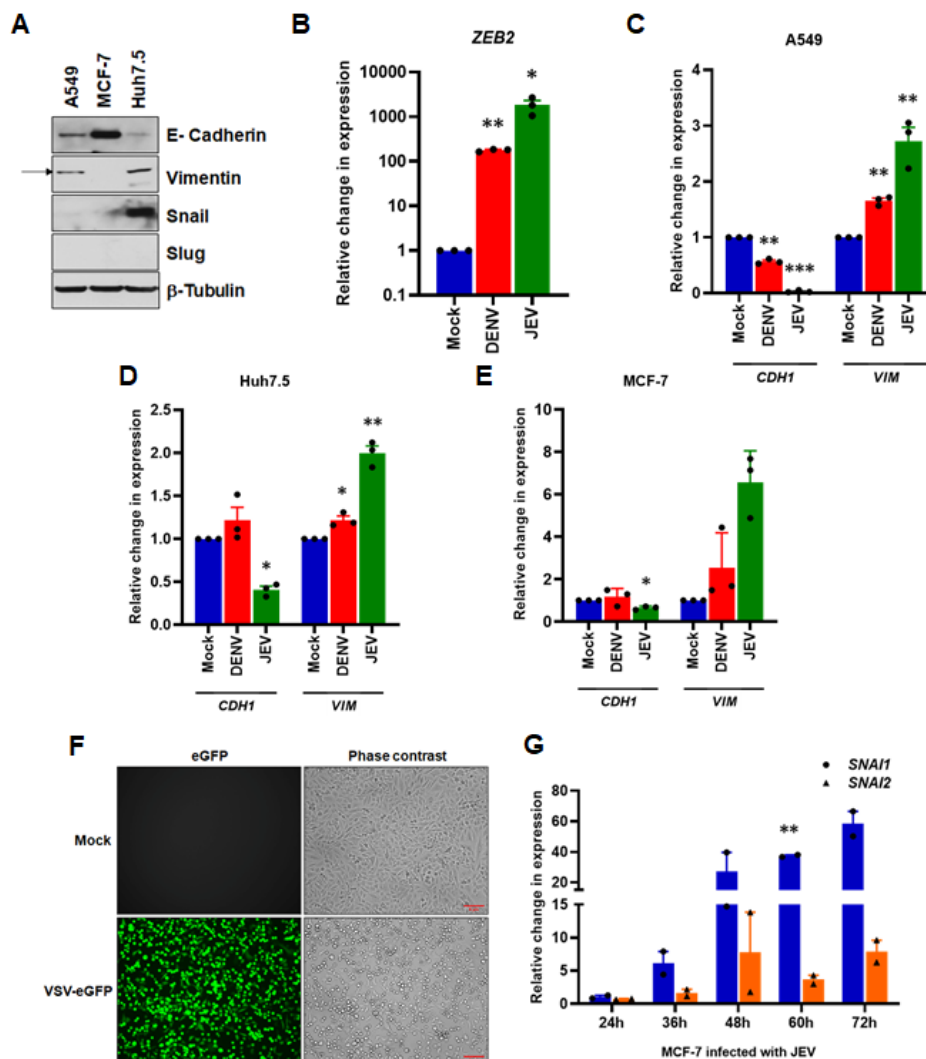

802

803

804 **Figure S1: Non-oncoviruses induce EMT.** (A) Profiling of EMT markers in three epithelial  
 805 cancer cell lines A549, MCF-7, and Huh7.5 by immunoblotting. (B) Real-time qRT-PCR  
 806 quantification of *ZEB2* in DENV and JEV infected A549 cells, as demonstrated in Figure 1B.  
 807 (C - E) Real-time qRT-PCR analysis of DENV and JEV infected A549 (C), Huh7.5 (D), and  
 808 MCF-7 cells (E), quantified for *CDH1* and *VIM* normalized against *GAPDH*. (F) Confirmation  
 809 of VSV infection in A549 cells. A549 cells were infected with VSV-eGFP at 0.01MOI for 18  
 810 hrs and directly visualized using a fluorescence microscope. (G) Quantification of *SNAI1* and  
 811 *SNAI2* transcripts in mock and JEV infected MCF-7 by real-time qRT-PCR at indicated time  
 812 points. *GAPDH* was used as the normalization control.

813

814

815 **Figure S2**

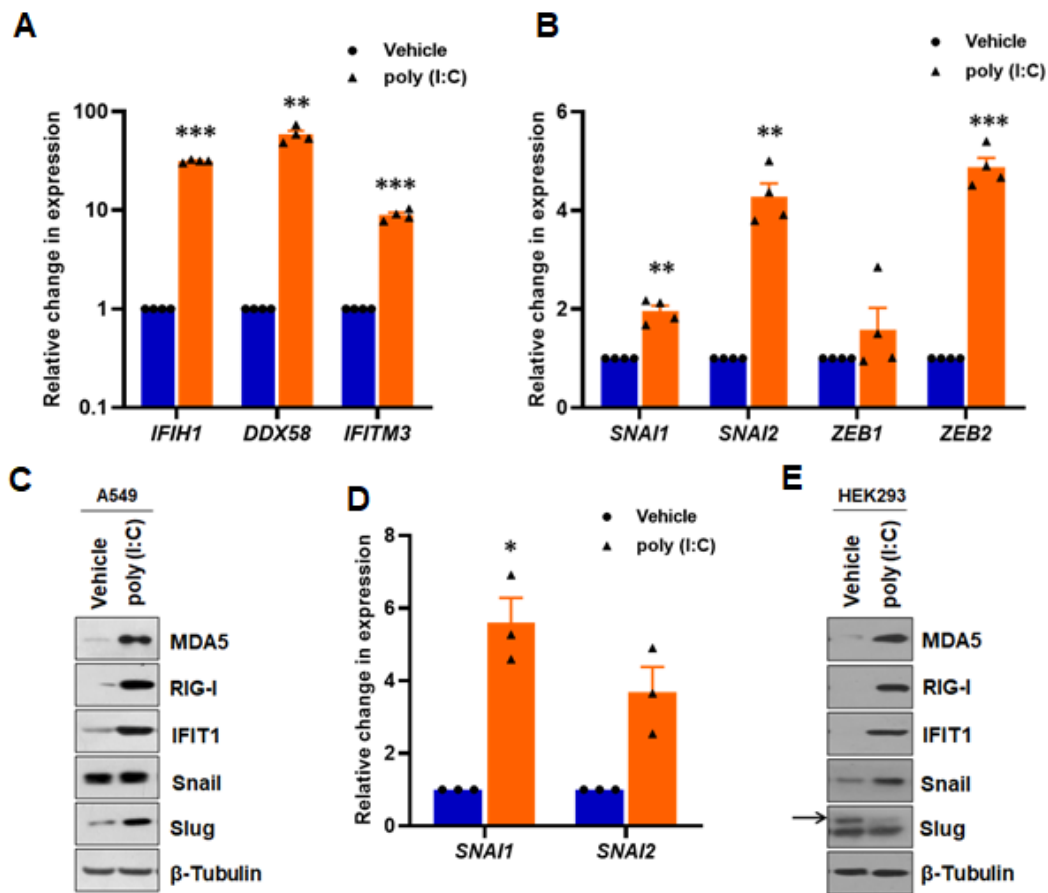

816

817

818 **Figure S2: EMT-TFs are activated by viral RNA.** Transfection of poly (I:C) into A549 cells  
819 (1000 ng/mL) and subsequent expression analysis of **(A)** antiviral genes, *IFIH1*, *DDX58*, and  
820 *IFITM3*, and **(B)** EMT-TFs, *SNAI1*, *SNAI2*, *ZEB1*, and *ZEB2*, by real-time qRT-PCR. *GAPDH*  
821 was used as the normalization control. **(C)** Expression levels of antiviral markers and EMT-  
822 TFs from vehicle and poly (I:C) transfected A549 detected by immunoblotting. **(D & E)**  
823 Analysis of EMT-TFs induction in HEK293 cells transfected with poly (I:C). Cells were  
824 transfected with 1000 ng/mL of poly (I:C) Quantitation of *SNAI1* and *SNAI2* **(D)** by real-time  
825 qRT-PCR in poly (I:C) transfected HEK293 cells. **(E)** Expression levels of antiviral markers  
826 and EMT-TFs from vehicle and poly (I:C) treated HEK293 detected by immunoblotting.

827

828

829

830

831

832 **Figure S3**

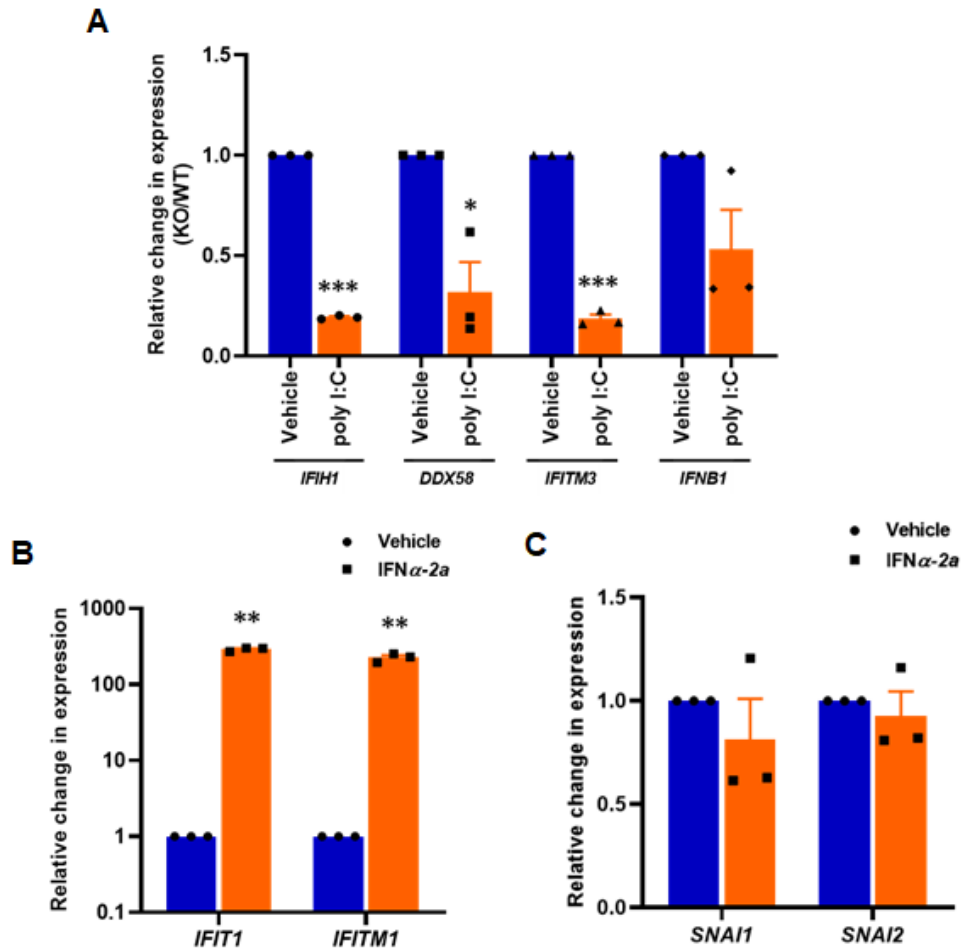

833

834

835 **Figure S3: RLRs regulate EMT-TFs expression:** (A) Effect of poly (I:C) treatment on  
836 antiviral genes, *IFIH1*, *DDX58*, *IFITM3*, and *IFNB1* in MAVS KO cells, compared to DWT  
837 cells. (B and C) Real-time qRT-PCR analysis to assess the effect of IFN $\alpha$ -2a on EMT-TFs  
838 treatment in MCF-7. Cells were grown to reach 70% confluency and treated with 50 ng/mL  
839 human IFN $\alpha$ -2a or PBS for 24 hrs. Cells were harvested and the respective transcripts were  
840 quantified.

841

842

843

844

845

846

847 **Figure S4**

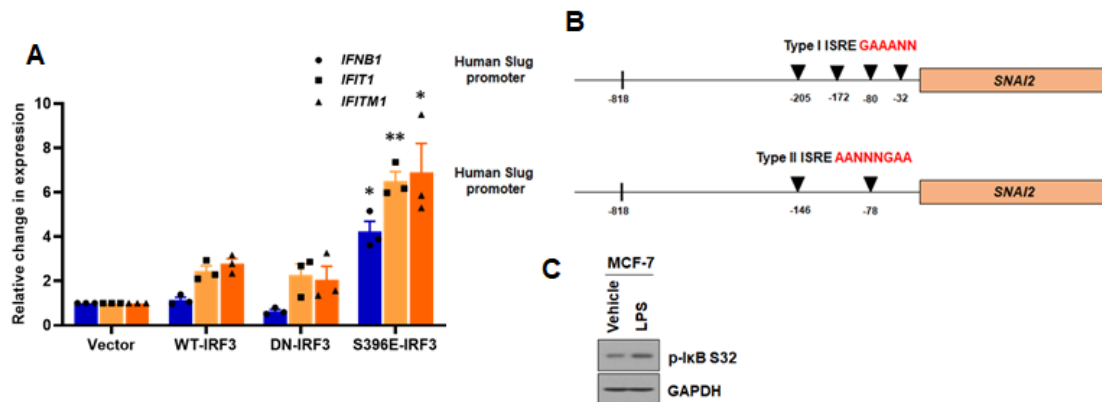

848

849

850 **Figure S4: Phosphorylated IRF3 regulates *SNAI1* and *SNAI2* transcription:** (A) Effect of  
851 over-expression of WT- and mutant IRF3 in MCF-7 cells on antiviral genes, *IFNB1*, *IFIT1*  
852 and, *IFITM1* upon quantified by real-time qRT-PCR. *GAPDH* was used as the normalization  
853 control. (B) Schematic representation of human Slug promoter for putative ISRE. Two types  
854 of ISRE, namely, type I – GAAANN and Type II – AANNNGAA, were identified in Slug  
855 promoter at indicated positions. (C) Immunoblot analysis of LPS treated MCF-7 cells for  
856 activation of the NF- $\kappa$ B pathway.

857

858

859

860

861

862

863

864

865

866

867

868

869

870

871

872 **Figure S5**

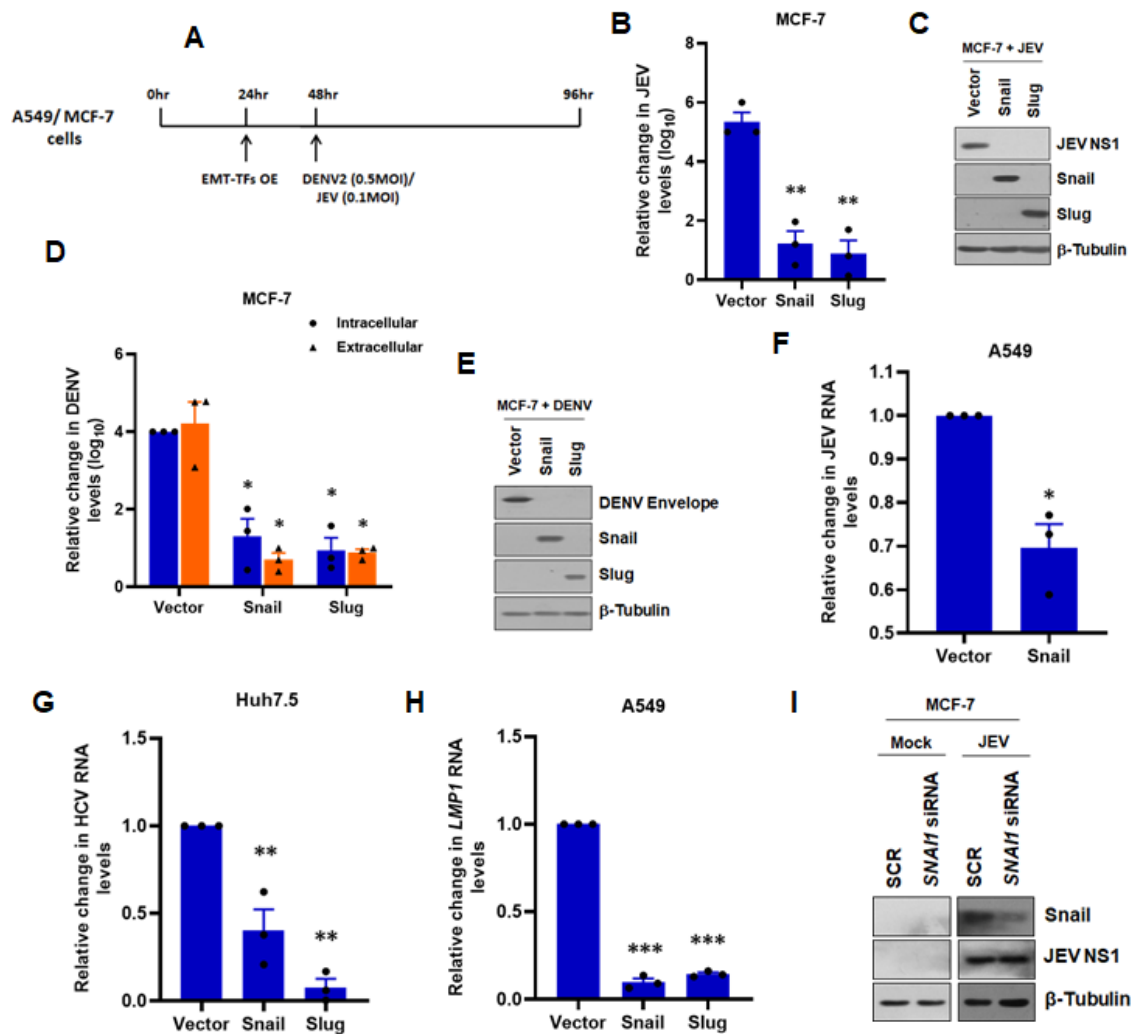

873

874 **Figure S5: EMT-TFs suppress viral infections through its DNA binding activity:** (A)  
 875 Schematic representation of the experimental setup for panels 5A – 5D. (B) Snail/Slug over-  
 876 expressing MCF-7 cells were infected with 0.1 MOI for 48 hrs. Cells were harvested and  
 877 assessed for intracellular JEV titer by real-time qRT-PCR. Simultaneously, cells were lysed  
 878 and immunoblotted (C) for JEV NS1, Snail, Slug, and β-Tubulin. (D & E) Similar to the panel  
 879 (B & C), but DENV infection was done at 0.5 MOI for 48 hrs. Supernatant and cells were  
 880 assayed for extracellular and intracellular titer (D) by foci forming assay and real-time qRT-  
 881 PCR, respectively. (E) Immunoblot analysis for DENV envelope, Snail, Slug, and β-Tubulin.  
 882 (F) For virus entry assay, A549 cells were transfected with Snail-expressing or empty vector  
 883 for 24 hrs, followed by JEV infection at 1 MOI for 2 hrs. 2 hpi, cells were washed with PBS to  
 884 remove unbound virus. Infected cells were treated with 50 μg/mL Proteinase K for 45 min to  
 885 remove uninternalized virus, followed by treatment with PBS containing PMSF to inactivate  
 886 Proteinase K. They were harvested and assayed for intracellular JEV RNA levels by real-  
 887 time qRT-PCR. (G) Huh7.5 cells expressing Snail/Slug/vector were infected with HCV (0.5  
 888 MOI) for 72 hrs. Intracellular HCV RNA levels were measured by real-time qRT-PCR, and  
 889 *GAPDH* was used as the normalization control. (H) Effect of Snail or Slug expression on

890 EBV infection in A549 cells. 48 hpi cells were harvested, and intracellular *LMP1* RNA levels  
891 were quantified by real-time qRT-PCR. (I) MCF-7 cells were transfected with either 250 nM  
892 *SNAI1* siRNA or scramble using Lipofectamine 3000 for 24 hrs. Following transfection, cells  
893 were either mock or JEV infected at 0.1 MOI for 48 hrs. Cells were harvested and  
894 immunoblotted for Snail and JEV NS1 to confirm knock down and infection.

895

896

897

898

899

900

901

902

903

904

905

906

907

908

909

910

911

912

913

914

915

916

917

918

919

920 **Figure S6**

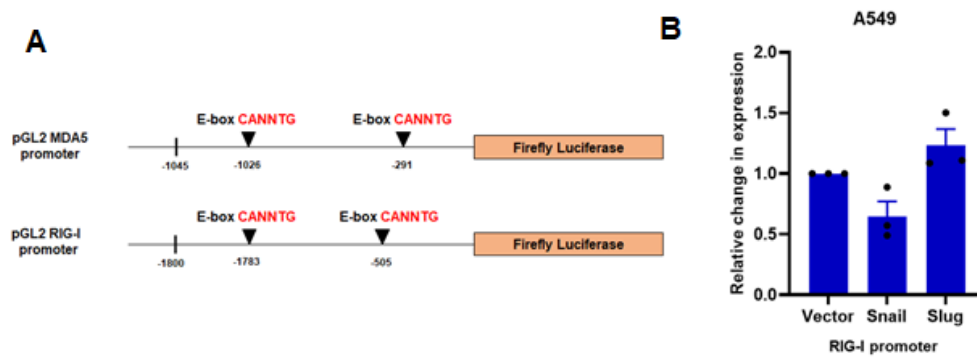

921

922 **Figure S6: EMT-TFs enhance RIG-I levels, but not through transcription:** (A) Schematic  
923 representation for canonical E-boxes located in *IFIH1* and *DDX58* promoter at mentioned  
924 positions. (B) Dual-luciferase assay in A549 cells co-transfected with pGL2 DDX58  
925 promoter-reporter construct and Snail/Slug/vector expression constructs. pRL-CMV vector  
926 was used as the normalization control. Relative F/R ratios of luciferase activity are  
927 represented in the graph.

928

929

930

931

932

933

934

935

936

937

938

939

940

941

942

943

944

945 **TABLES**

946 **Table 1: List of primers used for generating constructs.**

| Primer name                                | Primer sequence (5' – 3')                                             |
|--------------------------------------------|-----------------------------------------------------------------------|
| IRF3 FL WT For                             | CCCAAGCTTGCCACCATGTACCCATACGATGTTCCAGATTACGCTAT<br>GGGAACCCCAAAGCCA   |
| IRF3 FL WT Rev                             | CGGCTCGAGTCAGCTCTCCCCAGGGCCCTGGAAATCCATGC                             |
| IRF3 DN For                                | CCCAAGCTTGCCACCATGTACCCATACGATGTTCCAGATTACGCTGT<br>TGGGGACTTTTCCCAG   |
| IRF3 DN Rev<br>(same as IRF3 FL<br>WT Rev) | CGGCTCGAGTCAGCTCTCCCCAGGGCCCTGGAAATCCATGC                             |
| IRF3 S396E For                             | GACCTGCACATTGAGAACAGCCACCCA                                           |
| IRF3 S396E Rev                             | TGGGTGGCTGTTCTCAATGTGCAGGTC                                           |
| MAVS Δ CARD<br>For                         | ACGCGTCGACGCCACCATGTACCCATACGATGTTCCAGATTACGCTG<br>ACCGTCCCCCAGACCC   |
| MAVS Δ CARD<br>Rev                         | CTAGCTAGCCTAGTGCAGACGCCGCCGGTACAGCACCACCAGGAGT<br>GTG                 |
| Snail FL WT For                            | CCCAAGCTTGCCACCATGTACCCATACGATGTTCCAGATTACGCTAT<br>GCCGCGCTCTTTCCT    |
| Snail FL WT Rev                            | CGGGATCCTCAGCGGGGACATCCTGAGCAGCCGGACTCTTGGT                           |
| Slug FL WT For                             | GGGGTACCGCCACCATGGAACAAAAGCTTATTTCTGAAGAAGACTTG<br>ATGCCGCGCTCCTTCCTG |
| Slug FL WT Rev                             | CCGCTCGAGTCAGTGTGCTACACAGCAGCCAGATTCCTCATGTTTGT<br>GCAGGAGAGAC        |
| Snail C156A For                            | AAGGCCTTCAACGCCAAATACTGCAAC                                           |
| Snail C156A Rev                            | GTTGCAGTATTTGGCGTTGAAGGCCTT                                           |
| Snail C182A For                            | CCCTGCGTCGCAGGAACCTGC                                                 |
| Snail C182A Rev                            | GCAGGTTCTGCGACGCAGGG                                                  |
| Snail pro FL Mut1<br>For                   | CCCGGGAGGTACCCAGCTTCTCATCCTTCGGTG                                     |
| Snail pro FL Rev                           | AATGCCAAGCTTGGCGGGCCCTTATCTGCCAC                                      |
| Snail pro Mut2<br>For                      | GGGCGGAGTCTCTTCCGCCCCCT                                               |
| Snail pro Mut2<br>Rev                      | AGGGGGCGGAAAGAGACTCCGCC                                               |
| DDX58 (RIG-I)<br>pro For                   | GGGGTACCCACCACCCAGCCAATCATTGTATTTCTATACCG                             |
| DDX58 (RIG-I)                              | CCCAAGCTTGCCGGCCTCTGCTTGCAGCTAGCTACG                                  |



|         |  |
|---------|--|
| pro Rev |  |
|---------|--|

947

948 **Table 2: List of primers used for real-time qRT-PCR**

| Primer name               | Primer sequence (5' – 3')      |
|---------------------------|--------------------------------|
| JEV NS3 RT For            | AGAGCACCAAGGGAATGAAATAGT       |
| JEV NS3 RT Rev            | AATAAGTTGTAGTTGGGCACTCTG       |
| DENV2 Capsid RT For       | TCAATATGCTGAAACGCGAGAGAAACCG   |
| DENV2 Capsid RT Rev       | CGCCACAAGGGCCATGAACAGTTT       |
| HCV UTR Rev               | TGCACGGTCTACGAGACCTC           |
| HCV RT For                | TATGCCCCGGCCATTTGGGCG          |
| HCV RT Rev                | TACGAGACCTCCCGGGGCAC           |
| EBV LMP1 RT For           | CCCGCACCTCAACAAGCTACCGAT       |
| EBV LMP1 RT Rev           | TTGTCAGGACCACCTCCAGGTGCGC      |
| GAPDH RT For<br>(For EBV) | AGGGCTGCTTTAACTCTGGT           |
| GAPDH RT Rev<br>(For EBV) | CCCCACTTGATTTTGAGGGA           |
| GAPDH RT For              | ATGGGGAAGGTGAAGGTCG            |
| GAPDH RT Rev              | GGGGTCATTGATGGCAACAATA         |
| CDH1 RT For               | GGAGCCGCAGCCTCTCGGCG           |
| CDH1 RT Rev               | CCCAGGACGCGGCCTCTCTCCAG        |
| VIM RT For                | GTGGAGCGCGACAACCTG             |
| VIM RT Rev                | GACGTGCCAGAGACGCATTG           |
| CLDN1 RT For              | GCTGAATCTGAGCAGCACATTGCA       |
| CLDN1 RT Rev              | CCTCATCTTCTGCACCTCATCGTC       |
| SNAI1 RT For              | TCCGACCCCAATCGGAAGC            |
| SNAI1 RT Rev              | CGGAGGTGGGATGGCTGC             |
| SNAI2 RT For              | TTCAACGCCTCCAAAAGCCAAACTAC     |
| SNAI2 RT Rev              | TATGCTCCTGAGCTGAGGATCTCTG      |
| ZEB1 RT For               | TAAGCGCAGAAAGCAGGCGAA          |
| ZEB1 RT Rev               | TCTGTAACACTTTCTTCTCCACAATATGC  |
| ZEB2 RT For               | CGATCATGGCGGATGGCC             |
| ZEB2 RT Rev               | TTTCAGAACCTGTGTCCACTACATTGTCAT |
| TUBB RT For               | GCAACCAGATCGGCGCCAAG           |
| TUBB RT Rev               | CCAGGATGGCCCAGGTACATA          |
| IFNB1 RT For              | GCTCCTGTGGCAATTGAATGG          |
| IFNB1 RT Rev              | ACAATAGTCTCATTCCAGCCAG         |
| IFIT1 RT For              | AGAAGCAGGCAATCACAGAAAA         |

|               |                                         |
|---------------|-----------------------------------------|
| IFIT1 RT Rev  | CTGAAACCGACCATAGTGGAAT                  |
| IFIT3 RT For  | CCCACCCCTTTATATAGTTCCTTCAGTATTTAC       |
| IFIT3 RT Rev  | CACTGTCTTCCTTGAATAAGTTCCAGGTG           |
| IFIT5 RT For  | GGCCTGCAGAGCGCTGCCATCATG                |
| IFIT5 RT Rev  | AGGCCAATAGGTTATAAAGAGCAAGTCTAGATTTTGTGG |
| IFITM1 RT For | CTGTTCAACACCCTCTTCTTGAAGTGGTGC          |
| IFITM1 RT Rev | CAGGATGAATCCAATGGTCATGAGGATGCC          |
| IFITM2 RT For | ATGTGGTCTGGTCCCTGTTCAAC                 |
| IFITM2 RT Rev | GATGAGCAGAATGGTCATGAAGATGCC             |
| IFITM3 RT For | CCGACCATGTCTGTGGTCCCTG                  |
| IFITM3 RT Rev | TCATGAGGATGCCAGAATCAGGGC                |
| IFIH1 RT For  | GGAGGAACTGTTGACAATTGAAGACAGA            |
| IFIH1 RT Rev  | AAGTTCATTGTTTCTGTTTGACGAAGAAC           |
| DDX58 RT For  | TACCTACATCCTGAGCTACATGGCC               |
| DDX58 RT Rev  | GAAATCCCAACTTTCAATGGCTTCATAAAG          |
| mSnai1 RT For | CACACGCTGCCTTGTGTCT                     |
| mSnai1 RT Rev | GGTCAGCAAAGCACGGTT                      |
| mSnai2 RT For | TGGTCAAGAAACATTTCAACGC                  |
| mSnai2 RT Rev | GGTGAGGATCTCTGGTTTTGGT                  |
| mZeb1 RT For  | GCTGGCAAGACAACGTGAAAG                   |
| mZeb1 RT Rev  | GCCTCAGGATAAATGACGGC                    |
| mActB RT For  | CGACATGGAGAAGATCTGGCA                   |
| mActB RT Rev  | TACATGGCTGGGGTGTGAAG                    |
| Myco sp For   | GGGAGCAAACACGATAGATACCCT                |
| Myco sp Rev   | TGCACCATCTGTCACTCTGTTAACCTC             |

949

## 950 REFERENCES

- 951 1. Stetson DB, Medzhitov R. Type I Interferons in Host Defense. *Immunity*.  
952 2006;25(3):373-81.
- 953 2. Jensen S, Thomsen AR. Sensing of RNA viruses: a review of innate immune  
954 receptors involved in recognizing RNA virus invasion. *Journal of virology*. 2012;86(6):2900-  
955 10.
- 956 3. Chow KT, Jr. MG, Loo Y-M. RIG-I and Other RNA Sensors in Antiviral Immunity.  
957 *Annual Review of Immunology*. 2018;36(1):667-94.
- 958 4. Kang DC, Gopalkrishnan RV, Wu Q, Jankowsky E, Pyle AM, Fisher PB. mda-5: An  
959 interferon-inducible putative RNA helicase with double-stranded RNA-dependent ATPase  
960 activity and melanoma growth-suppressive properties. *Proceedings of the National Academy  
961 of Sciences of the United States of America*. 2002;99(2):637-42.
- 962 5. Yoneyama M, Kikuchi M, Matsumoto K, Imaizumi T, Miyagishi M, Taira K, et al.  
963 Shared and unique functions of the DExD/H-box helicases RIG-I, MDA5, and LGP2 in  
964 antiviral innate immunity. *Journal of immunology (Baltimore, Md : 1950)*. 2005;175(5):2851-  
965 8.

- 966 6. Yoneyama M, Kikuchi M, Natsukawa T, Shinobu N, Imaizumi T, Miyagishi M, et al.  
967 The RNA helicase RIG-I has an essential function in double-stranded RNA-induced innate  
968 antiviral responses. *Nature immunology*. 2004;5(7):730-7.
- 969 7. Fitzgerald KA, McWhirter SM, Faia KL, Rowe DC, Latz E, Golenbock DT, et al.  
970 IKKepsilon and TBK1 are essential components of the IRF3 signaling pathway. *Nature*  
971 *immunology*. 2003;4(5):491-6.
- 972 8. Liu S, Cai X, Wu J, Cong Q, Chen X, Li T, et al. Phosphorylation of innate immune  
973 adaptor proteins MAVS, STING, and TRIF induces IRF3 activation. *Science (New York, NY)*.  
974 2015;347(6227):aaa2630.
- 975 9. Seth RB, Sun L, Ea CK, Chen ZJ. Identification and characterization of MAVS, a  
976 mitochondrial antiviral signaling protein that activates NF-kappaB and IRF 3. *Cell*.  
977 2005;122(5):669-82.
- 978 10. Sharma S, tenOever BR, Grandvaux N, Zhou GP, Lin R, Hiscott J. Triggering the  
979 interferon antiviral response through an IKK-related pathway. *Science (New York, NY)*.  
980 2003;300(5622):1148-51.
- 981 11. De Craene B, Berx G. Regulatory networks defining EMT during cancer initiation and  
982 progression. *Nature reviews*. 2013;13(2):97-110.
- 983 12. Kalluri R, Weinberg RA. The basics of epithelial-mesenchymal transition. *J Clin*  
984 *Invest*. 2009;119(6):1420-8.
- 985 13. Thiery JP, Acloque H, Huang RY, Nieto MA. Epithelial-mesenchymal transitions in  
986 development and disease. *Cell*. 2009;139(5):871-90.
- 987 14. Lamouille S, Xu J, Derynck R. Molecular mechanisms of epithelial-mesenchymal  
988 transition. *Nature reviews Molecular cell biology*. 2014;15(3):178-96.
- 989 15. Xu R, Won J-Y, Kim C-H, Kim D-E, Yim H. Roles of the Phosphorylation of  
990 Transcriptional Factors in Epithelial-Mesenchymal Transition. *J Oncol*. 2019;2019:5810465-.
- 991 16. Gonzalez DM, Medici D. Signaling mechanisms of the epithelial-mesenchymal  
992 transition. *Sci Signal*. 2014;7(344):re8-re.
- 993 17. Xu X, Fan Z, Kang L, Han J, Jiang C, Zheng X, et al. Hepatitis B virus X protein  
994 represses miRNA-148a to enhance tumorigenesis. *J Clin Invest*. 2013;123(2):630-45.
- 995 18. Jung YS, Kato I, Kim HR. A novel function of HPV16-E6/E7 in epithelial-  
996 mesenchymal transition. *Biochemical and biophysical research communications*.  
997 2013;435(3):339-44.
- 998 19. Horikawa T, Yang J, Kondo S, Yoshizaki T, Joab I, Furukawa M, et al. Twist and  
999 epithelial-mesenchymal transition are induced by the EBV oncoprotein latent membrane  
1000 protein 1 and are associated with metastatic nasopharyngeal carcinoma. *Cancer research*.  
1001 2007;67(5):1970-8.
- 1002 20. Bose SK, Meyer K, Di Bisceglie AM, Ray RB, Ray R. Hepatitis C virus induces  
1003 epithelial-mesenchymal transition in primary human hepatocytes. *J Virol*.  
1004 2012;86(24):13621-8.
- 1005 21. Chen X, Bode AM, Dong Z, Cao Y. The epithelial-mesenchymal transition (EMT) is  
1006 regulated by oncoviruses in cancer. *FASEB journal : official publication of the Federation of*  
1007 *American Societies for Experimental Biology*. 2016;30(9):3001-10.
- 1008 22. Kindrachuk J, Wahl-Jensen V, Safronetz D, Trost B, Hoenen T, Arsenault R, et al.  
1009 Ebola virus modulates transforming growth factor beta signaling and cellular markers of  
1010 mesenchyme-like transition in hepatocytes. *J Virol*. 2014;88(17):9877-92.
- 1011 23. Xiang Z, Liang Z, Yanfeng H, Leitao K. Persistence of RSV promotes proliferation  
1012 and epithelial-mesenchymal transition of bronchial epithelial cells through Nodal signaling.  
1013 *Journal of medical microbiology*. 2017;66(10):1499-505.
- 1014 24. Teo WH, Chen HP, Huang JC, Chan YJ. Human cytomegalovirus infection enhances  
1015 cell proliferation, migration and upregulation of EMT markers in colorectal cancer-derived  
1016 stem cell-like cells. *International journal of oncology*. 2017;51(5):1415-26.
- 1017 25. Minor DM, Proud D. Role of human rhinovirus in triggering human airway epithelial-  
1018 mesenchymal transition. *Respiratory research*. 2017;18(1):110.

- 1019 26. Lan X, Wen H, Cheng K, Plagov A, Marashi Shoshtari SS, Malhotra A, et al.  
1020 Hedgehog pathway plays a vital role in HIV-induced epithelial-mesenchymal transition of  
1021 podocyte. *Experimental cell research*. 2017;352(2):193-201.
- 1022 27. Akkari L, Gregoire D, Floc'h N, Moreau M, Hernandez C, Simonin Y, et al. Hepatitis  
1023 C viral protein NS5A induces EMT and participates in oncogenic transformation of primary  
1024 hepatocyte precursors. *J Hepatol*. 2012;57(5):1021-8.
- 1025 28. Shin Kim S, Yeom S, Kwak J, Ahn HJ, Lib Jang K. Hepatitis B virus X protein induces  
1026 epithelial-mesenchymal transition by repressing E-cadherin expression via upregulation of  
1027 E12/E47. *The Journal of general virology*. 2016;97(1):134-43.
- 1028 29. Wang B, Wang H, Yang Z. MiR-122 inhibits cell proliferation and tumorigenesis of  
1029 breast cancer by targeting IGF1R. *PLoS One*. 2012;7(10):e47053.
- 1030 30. Fujita N, Jaye DL, Kajita M, Geigerman C, Moreno CS, Wade PA. MTA3, a Mi-  
1031 2/NuRD complex subunit, regulates an invasive growth pathway in breast cancer. *Cell*.  
1032 2003;113(2):207-19.
- 1033 31. Reimer T, Brcic M, Schweizer M, Jungi TW. poly(I:C) and LPS induce distinct IRF3  
1034 and NF- $\kappa$ B signaling during type-I IFN and TNF responses in human macrophages. *Journal*  
1035 *of Leukocyte Biology*. 2008;83(5):1249-57.
- 1036 32. Villarejo A, Cortés-Cabrera A, Molina-Ortiz P, Portillo F, Cano A. Differential role of  
1037 Snail1 and Snail2 zinc fingers in E-cadherin repression and epithelial to mesenchymal  
1038 transition. *The Journal of biological chemistry*. 2014;289(2):930-41.
- 1039 33. Jiang X, Kinch LN, Brautigam CA, Chen X, Du F, Grishin NV, et al. Ubiquitin-induced  
1040 oligomerization of the RNA sensors RIG-I and MDA5 activates antiviral innate immune  
1041 response. *Immunity*. 2012;36(6):959-73.
- 1042 34. Oshiumi H. Recent Advances and Contradictions in the Study of the Individual Roles  
1043 of Ubiquitin Ligases That Regulate RIG-I-Like Receptor-Mediated Antiviral Innate Immune  
1044 Responses. *Frontiers in immunology*. 2020;11:1296.
- 1045 35. Hopfner KP, Hornung V. Molecular mechanisms and cellular functions of cGAS-  
1046 STING signalling. *Nature reviews Molecular cell biology*. 2020;21(9):501-21.
- 1047 36. Elion DL, Cook RS. Harnessing RIG-I and intrinsic immunity in the tumor  
1048 microenvironment for therapeutic cancer treatment. *Oncotarget*. 2018;9(48):29007-17.
- 1049 37. Wu Y, Wu X, Wu L, Wang X, Liu Z. The anticancer functions of RIG-I-like receptors,  
1050 RIG-I and MDA5, and their applications in cancer therapy. *Translational research : the*  
1051 *journal of laboratory and clinical medicine*. 2017;190:51-60.
- 1052 38. Muvaffak A, Pan Q, Yan H, Fernandez R, Lim J, Dolinski B, et al. Evaluating TBK1  
1053 as a therapeutic target in cancers with activated IRF3. *Molecular cancer research : MCR*.  
1054 2014;12(7):1055-66.
- 1055 39. An X, Zhu Y, Zheng T, Wang G, Zhang M, Li J, et al. An Analysis of the Expression  
1056 and Association with Immune Cell Infiltration of the cGAS/STING Pathway in Pan-Cancer.  
1057 *Molecular therapy Nucleic acids*. 2019;14:80-9.
- 1058 40. Lu S, Pardini B, Cheng B, Naccarati A, Huhn S, Vymetalkova V, et al. Single  
1059 nucleotide polymorphisms within interferon signaling pathway genes are associated with  
1060 colorectal cancer susceptibility and survival. *PLoS One*. 2014;9(10):e111061.
- 1061 41. Woo SR, Fuertes MB, Corrales L, Spranger S, Furdyna MJ, Leung MY, et al. STING-  
1062 dependent cytosolic DNA sensing mediates innate immune recognition of immunogenic  
1063 tumors. *Immunity*. 2014;41(5):830-42.
- 1064 42. Horn LA, Fousek K, Palena C. Tumor Plasticity and Resistance to Immunotherapy.  
1065 *Trends in cancer*. 2020;6(5):432-41.
- 1066 43. Harouaka D, Engle RE, Wollenberg K, Diaz G, Tice AB, Zamboni F, et al. Diminished  
1067 viral replication and compartmentalization of hepatitis C virus in hepatocellular carcinoma  
1068 tissue. *Proceedings of the National Academy of Sciences of the United States of America*.  
1069 2016;113(5):1375-80.
- 1070 44. Shirogane Y, Takeda M, Tahara M, Ikegame S, Nakamura T, Yanagi Y. Epithelial-  
1071 mesenchymal transition abolishes the susceptibility of polarized epithelial cell lines to  
1072 measles virus. *The Journal of biological chemistry*. 2010;285(27):20882-90.

- 1073 45. Vрати S. Comparison of the genome sequences and the phylogenetic analyses of the  
1074 GP78 and the Vellore P20778 isolates of Japanese encephalitis virus from India. *Journal of*  
1075 *biosciences*. 2000;25(3):257-62.
- 1076 46. Ojha A, Nandi D, Batra H, Singhal R, Annarapu GK, Bhattacharyya S, et al. Platelet  
1077 activation determines the severity of thrombocytopenia in dengue infection. *Scientific*  
1078 *Reports*. 2017;7(1):41697.
- 1079 47. Lindenbach BD, Evans MJ, Syder AJ, Wölk B, Tellinghuisen TL, Liu CC, et al.  
1080 Complete Replication of Hepatitis C Virus in Cell Culture. *Science (New York, NY)*.  
1081 2005;309(5734):623.
- 1082 48. George A, Panda S, Kudmulwar D, Chhatbar SP, Nayak SC, Krishnan HH. Hepatitis  
1083 C virus NS5A binds to the mRNA cap-binding eukaryotic translation initiation 4F (eIF4F)  
1084 complex and up-regulates host translation initiation machinery through eIF4E-binding protein  
1085 1 inactivation. *The Journal of biological chemistry*. 2012;287(7):5042-58.
- 1086 49. Krishna G, Soman Pillai V, Valiya Veetil M. Upregulation of GLS1 Isoforms KGA and  
1087 GAC Facilitates Mitochondrial Metabolism and Cell Proliferation in Epstein-Barr Virus  
1088 Infected Cells. *Viruses*. 2020;12(8).
- 1089 50. Lan K, Verma SC, Murakami M, Bajaj B, Robertson ES. Epstein-Barr Virus (EBV):  
1090 infection, propagation, quantitation, and storage. *Current protocols in microbiology*.  
1091 2007;Chapter 14:Unit 14E.2.
- 1092 51. Vрати S, Agarwal V, Malik P, Wani SA, Saini M. Molecular characterization of an  
1093 Indian isolate of Japanese encephalitis virus that shows an extended lag phase during  
1094 growth. *The Journal of general virology*. 1999;80 ( Pt 7):1665-71.
- 1095 52. Johri MK, Lashkari HV, Gupta D, Vedagiri D, Harshan KH. mTORC1 restricts  
1096 hepatitis C virus RNA replication through ULK1-mediated suppression of miR-122 and  
1097 facilitates post-replication events. *The Journal of general virology*. 2020;101(1):86-95.
- 1098 53. Mukherjee S, Akbar I, Kumari B, Vрати S, Basu A, Banerjee A. Japanese Encephalitis  
1099 Virus-induced let-7a/b interacted with the NOTCH-TLR7 pathway in microglia and facilitated  
1100 neuronal death via caspase activation. *Journal of neurochemistry*. 2019;149(4):518-34.
- 1101 54. Sengupta N, Ghosh S, Vasaikar SV, Gomes J, Basu A. Modulation of Neuronal  
1102 Proteome Profile in Response to Japanese Encephalitis Virus Infection. *PLOS ONE*.  
1103 2014;9(3):e90211.
- 1104 55. Hazra B, Chakraborty S, Bhaskar M, Mukherjee S, Mahadevan A, Basu A. miR-301a  
1105 Regulates Inflammatory Response to Japanese Encephalitis Virus Infection via Suppression  
1106 of NKRF Activity. *Journal of immunology (Baltimore, Md : 1950)*. 2019;203(8):2222-38.

1107
